# Supplementary material for: Redox-induced reversible [2 + 2] cycloaddition of an etheno-fused diporphyrin
Source: PubMed Central journal article supplement (PMC8179634; doi:10.1039/d1sc00438g), 2021-02-24
Supplement: SC-012-D1SC00438G-s001.pdf [file SC-012-D1SC00438G-s001.pdf]

## Electronic Supporting Information

# Redox-Induced Reversible [2+2] Cycloaddition of an Etheno-Fused Diporphyrin

Kazuya Miyagawa,<sup>1</sup> Ichiro Hisaki,<sup>2</sup> Norihito Fukui,<sup>1</sup> and Hiroshi Shinokubo\*<sup>1</sup>

<sup>1</sup>Department of Molecular and Macromolecular Chemistry, Graduate School of Engineering, Nagoya University, Furo-cho, Chikusa-ku, Nagoya 464-8603 (Japan)

<sup>2</sup>Graduate School of Engineering Science, Osaka University, 1-3 Machikaneyama, Toyonaka, Osaka 560-8531 (Japan)

E-mail: [hshino@chembio.nagoya-u.ac.jp](mailto:hshino@chembio.nagoya-u.ac.jp)

## Table of Contents

|                                                           |    |
|-----------------------------------------------------------|----|
| 1. Instrumentation and materials .....                    | 3  |
| 2. Experimental procedures and compound data .....        | 4  |
| 3. NMR spectra .....                                      | 13 |
| 4. Crystal data.....                                      | 29 |
| 5. Temperature-dependent <sup>1</sup> H NMR spectra ..... | 31 |
| 6. Temperature-dependent UV-vis absorption spectra .....  | 32 |
| 7. Cyclic voltammograms .....                             | 33 |
| 8. Spectroelectrochemistry.....                           | 34 |
| 9. UV/vis/NIR absorption spectra.....                     | 35 |
| 10. Photostability .....                                  | 36 |
| 11. DFT calculations .....                                | 37 |
| 12. References.....                                       | 41 |

## 1. Instrumentation and materials

---

$^1\text{H}$  NMR (500 MHz) and  $^{13}\text{C}$  NMR (126 MHz) spectra were recorded on a Varian INOVA-500 spectrometer. Chemical shifts were reported as the delta scale in ppm relative to  $\text{CHCl}_3$  ( $\delta = 7.26$  ppm) for  $^1\text{H}$  NMR and  $\text{CDCl}_3$  ( $\delta = 77.16$  ppm) for  $^{13}\text{C}$  NMR.

UV/vis/NIR absorption spectra were recorded on a Shimadzu UV-2550 or JASCP V 670 spectrometer.

High-resolution atmospheric pressure chemical ionization time-of-flight (APCI-TOF) and electrospray ionization time-of-flight (ESI-TOF) mass spectra were taken on a Bruker micrOTOF instrument using a positive ionization mode. High-resolution matrix assisted laser desorption and ionization time-of-flight (MALDI-TOF) mass spectra were taken on a Bruker autoflex max using a positive ionization mode.

X-ray data were obtained using a Rigaku CCD diffractometer (Saturn 724 with MicroMax-007) with Varimax Mo optics.

Cyclic voltammograms were obtained under the following conditions; solvent:  $\text{CH}_2\text{Cl}_2$ , electrolyte: 0.1 M  $\text{Bu}_4\text{NPF}_6$ , working electrode: glassy carbon, counter electrode: Pt, reference electrode:  $\text{Ag}/\text{AgNO}_3$ , scan rate: 0.1 V/s.

Photo-irradiation was conducted by the USHIO OPM2-252H lamp house equipped with a super-high pressure mercury lamp (250 W) and a sharp cut filter L38.

All calculations were carried out using the *Gaussian 09* software package.<sup>1</sup> Initial geometry for the calculations of  $\mathbf{1b}^+$  and  $\mathbf{1b}^{2+}$  were obtained from the X-ray crystal structure of  $\mathbf{1b}[\text{SbCl}_6]_2$ . Aryl groups at the *meso*-positions were omitted to simplify the calculations. The structures were optimized by density functional theory (DFT) method with B3LYP level, employing basis sets 6-31G(d) for C, H, and N and SDD for Ni. The oscillator strengths of  $\mathbf{1b}^+$  and  $\mathbf{1b}^{2+}$  were computed by the TD-DFT formalism at the B3LYP/6-31G(d)+SDD level.

Tetrahydrofuran (THF) was purchased from Wako Pure Chemical Industries, Ltd. as a dehydrated grade. Dry  $\text{CH}_2\text{Cl}_2$  was prepared by distillation from  $\text{CaH}_2$ . Unless otherwise noted, materials obtained from commercial suppliers were used without further purification.

## 2. Experimental procedures and compound data

---

### 2-Iodo-10-(3,5-di-*tert*-butylphenyl)-5,15-dimesitylporphyrinato nickel(II) **S2**

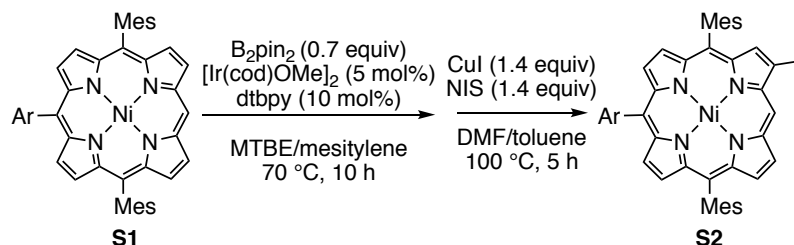

A Schlenk tube containing **S1**<sup>2</sup> (1.0 g, 1.3 mmol),  $B_2pin_2$  (0.23 g, 0.88 mmol),  $[Ir(cod)OMe]_2$  (42 mg, 0.063 mol), and 4,4'-di-*tert*-butyl-2,2'-bipyridyl (dtbpy, 34 mg, 0.13 mmol) was filled with  $N_2$ , and then charged with mesitylene (13 mL) and methyl *tert*-butyl ether (MTBE, 38 mL). After stirring at 70 °C for 10 h, the reaction mixture was passed through short silica gel column eluting with  $CH_2Cl_2$ . After removal of the solvent *in vacuo*, the crude mixture was dissolved in *N,N*-dimethylformamide (DMF, 80 mL) and toluene (40 mL). To the resulting solution, *N*-iodosuccinimide (NIS, 0.40 g, 1.8 mmol) and CuI (0.34 g, 1.8 mmol) were added. After stirring at 100 °C for 5 h, the reaction mixture was quenched with aqueous  $NH_4Cl$  solution, extracted with toluene, washed with aqueous  $Na_2S_2O_3$  solution, water, and brine, and dried over  $Na_2SO_4$ . After removal of the solvent *in vacuo*, the residue was separated by silica gel chromatography eluting with  $CH_2Cl_2$ /hexane (1:20). After removal of the solvent *in vacuo*, recrystallization from  $CH_2Cl_2$ /MeOH gave **S2** (0.97 g, 1.1 mmol, 84%).

$^1H$  NMR (500 MHz,  $CDCl_3$ , 298 K):  $\delta$  = 9.86 (s, 1H, *meso*), 9.16 (d,  $J$  = 5.0 Hz, 1H,  $\beta$ ), 8.94 (s, 1H,  $\beta$ ), 8.77 (d,  $J$  = 5.0 Hz, 1H,  $\beta$ ), 8.76 (d,  $J$  = 5.0 Hz, 1H,  $\beta$ ), 8.72 (d,  $J$  = 5.0 Hz, 1H,  $\beta$ ), 8.63 (d,  $J$  = 5.0 Hz, 1H,  $\beta$ ), 8.61 (d,  $J$  = 5.0 Hz, 1H,  $\beta$ ), 7.90 (d,  $J$  = 1.5 Hz, 2H, Ar-*o*), 7.25 (t,  $J$  = 2.0 Hz, 1H, Ar-*p*), 7.23 (s, 4H, Mes), 2.59 (s, 3H, Mes), 2.59 (s, 3H, Mes), 1.81 (s, 6H, Mes), 1.81 (s, 6H, Mes), 1.47 (s, 18H, *t*-Bu) ppm;  $^{13}C$  NMR (126 MHz,  $CDCl_3$ , 298 K):  $\delta$  = 149.0, 144.0, 143.5, 143.5, 143.2, 143.1, 142.7, 142.5, 141.5, 140.1, 139.3, 139.2, 139.1, 138.0, 137.9, 137.2, 137.0, 133.2, 133.2, 133.1, 131.8, 131.4, 131.3, 129.1, 128.0, 127.9, 121.2, 120.9, 117.5, 116.4, 105.0, 91.1, 35.2, 31.8, 21.5, 21.5 ppm (Some signals due to alkyl groups were overlapped.); HRMS (APCI):  $[M+H]^+$  Calcd for  $C_{52}H_{51}IN_4Ni$  917.2585; Found 917.2544.

## 2-Iodo-10-(3,5-di-*tert*-butylphenyl)-5,15-dimesitylporphyrin **S2**

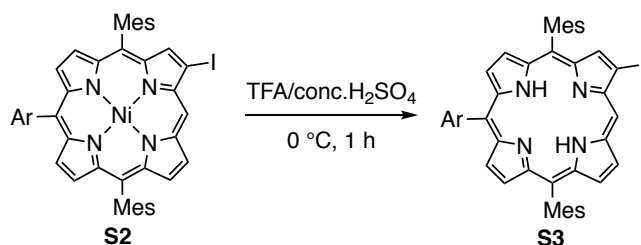

Conc. H<sub>2</sub>SO<sub>4</sub> (13 mL) was added slowly to a mixture of **S2** (3.3 g, 3.6 mmol) and trifluoroacetic acid (TFA, 50 mL) at 0 °C. After stirring at 0 °C for 1 h, the reaction mixture was quenched with an equimolar amount of NaOH solution at 0 °C. The product was extracted with CH<sub>2</sub>Cl<sub>2</sub>, washed with brine, and dried over Na<sub>2</sub>SO<sub>4</sub>. After removal of the solvent *in vacuo*, the residue was separated by silica gel chromatography eluting with CH<sub>2</sub>Cl<sub>2</sub>/hexane (1:4). After removal of the solvent *in vacuo*, recrystallization from CH<sub>2</sub>Cl<sub>2</sub>/MeOH gave **S3** (2.2 g, 2.6 mmol, 73%).

<sup>1</sup>H NMR (500 MHz, CDCl<sub>3</sub>, 298 K):  $\delta$  = 10.19 (s, 1H, *meso*), 9.40 (d,  $J$  = 4.5 Hz, 1H,  $\beta$ ), 8.97 (s, 1H,  $\beta$ ), 8.92 (d,  $J$  = 5.0 Hz, 1H,  $\beta$ ), 8.88 (d,  $J$  = 4.5 Hz, 1H,  $\beta$ ), 8.77 (d,  $J$  = 4.5 Hz, 1H,  $\beta$ ), 8.77 (d,  $J$  = 4.5 Hz, 1H,  $\beta$ ), 8.64 (d,  $J$  = 4.5 Hz, 1H,  $\beta$ ), 8.06 (d,  $J$  = 2.0 Hz, 2H, Ar-*o*), 7.79 (t,  $J$  = 1.8 Hz 1H, Ar-*p*), 7.30 (s, 4H, Mes), 2.64 (s, 3H, Mes), 2.64 (s, 3H, Mes), 1.85 (s, 6H, Mes), 1.84 (s, 6H, Mes), 1.51 (s, 18H, *t*-Bu), -2.83 (s, 2H, NH) ppm; <sup>13</sup>C NMR (126 MHz, CDCl<sub>3</sub>, 298 K):  $\delta$  = 148.7, 148.6, 141.0, 140.4, 139.5, 139.4, 139.4, 138.2, 138.0, 137.9, 137.9, 137.7, 137.7, 135.1, 132.6, 129.9, 129.6, 129.2, 127.9, 127.8, 127.8, 127.4, 121.8, 121.4, 121.1, 121.0, 118.2, 117.6, 117.3, 103.8, 35.1, 31.7, 21.7, 21.7, 21.5 ppm (Some signals due to alkyl groups were overlapped. Some signals due to aromatic protons are too broad to be observed because of the amine-imine tautomerization.); HRMS (APCI): [M+H]<sup>+</sup> Calcd for C<sub>52</sub>H<sub>53</sub>IN<sub>4</sub> 861.3388; Found 861.3346.

## 1,2-Bis(2-(10-bis(3,5-di-*tert*-butylphenyl)-5,15-mesityl)porphyrinyl)acetylene **S4**

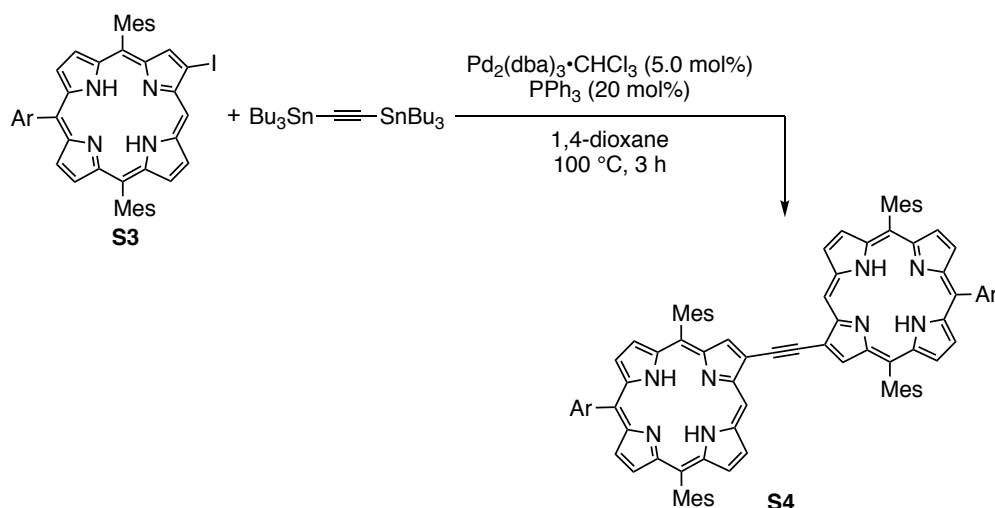

A two-necked, stoppered round bottomed flask containing **S3** (0.50 g, 0.58 mmol),  $\text{Pd}_2(\text{dba})_3\cdot\text{CHCl}_3$  (31 mg, 29  $\mu\text{mol}$ ), and  $\text{PPh}_3$  (30 mg, 0.12 mmol) was filled with  $\text{N}_2$ , and then charged with dry 1,4-dioxane (30 mL). To the solution, bis(tributylstannyl)ethyne (0.15 mL, 0.18 g, 0.290 mmol) was added. After stirring at 100 °C for 12 h, the reaction mixture was passed through short silica column eluting with toluene. After removal of the solvent *in vacuo*, the residue was purified by silica gel chromatography eluting with  $\text{CH}_2\text{Cl}_2$ /hexane (1/3). After removal of the solvent *in vacuo*, recrystallization from  $\text{CH}_2\text{Cl}_2$ /methanol gave **S4** (0.29 g, 0.19 mmol, 67%).

$^1\text{H}$  NMR (500 MHz, toluene- $d_8$ / $\text{CS}_2$  (1/1), 298 K):  $\delta$  = 10.79 (s, 2H, *meso*), 9.23 (s, 2H,  $\beta$ ), 9.12 (d,  $J$  = 4.5 Hz, 2H,  $\beta$ ), 8.81 (d,  $J$  = 5.0 Hz, 2H,  $\beta$ ), 8.70 (d,  $J$  = 4.5 Hz, 2H,  $\beta$ ), 8.69 (d,  $J$  = 4.5 Hz, 2H,  $\beta$ ), 8.67 (d,  $J$  = 4.5 Hz, 2H,  $\beta$ ), 8.54 (d,  $J$  = 4.5 Hz, 2H,  $\beta$ ), 7.99 (d,  $J$  = 1.5 Hz, 4H, *Ar-o*) 7.72 (t,  $J$  = 1.8 Hz, 2H, *Ar-p*), 7.20 (s, 4H, Mes), 7.13 (s, 4H, Mes), 2.54 (s, 6H, Mes), 2.49 (s, 6H, Mes), 1.91 (s, 12H, Mes), 1.82 (s, 12H, Mes), 1.43 (s, 36H, *t*-Bu), -2.44 (s, 4H, NH) ppm;  $^{13}\text{C}$  NMR (126 MHz, toluene- $d_8$ / $\text{CS}_2$  (1/1), 298 K):  $\delta$  = 148.9, 142.1, 139.8, 139.6, 138.7, 138.5, 138.2, 137.9, 137.7, 137.3, 137.2, 135.3, 132.7, 130.2, 129.3, 128.7, 128.5, 128.4, 127.7, 125.6, 124.8, 122.0, 121.4, 118.7, 118.2, 103.1, 95.2, 35.2, 32.1, 22.2, 22.2, 22.1, 22.0 ppm (Some signals due to aromatic protons are too broad to be observed because of the amine-imine tautomerization.); HRMS (ESI):  $[\text{M}]^+$  Calcd for  $\text{C}_{106}\text{H}_{106}\text{N}_8$  1492.8646; Found 1492.8700.

## 1,2-Bis(2-(10-bis(3,5-di-*tert*-butylphenyl)-5,15-mesityl)Zn(II)porphyrinyl)acetylene **S5**

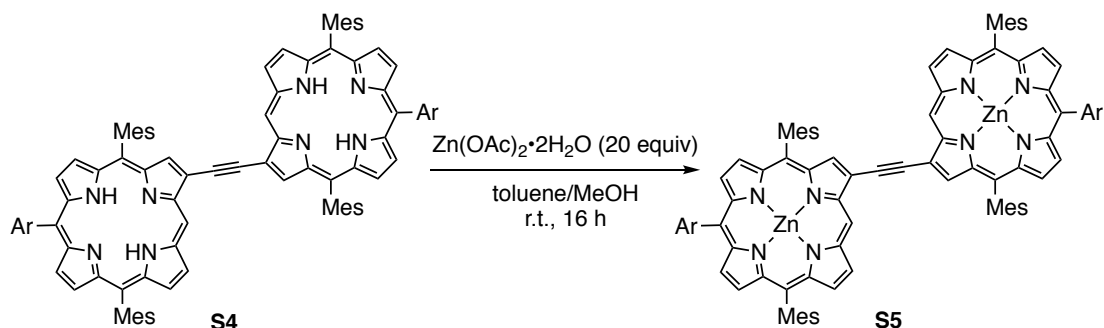

To a solution of **S4** (0.17 g, 0.11 mmol) in toluene (30 mL) was added a solution of zinc acetate dihydrate (0.49 g, 2.3 mmol) in MeOH (6.0 mL). After stirring at room temperature for 16 h, the reaction mixture was passed through short silica column eluting with toluene. After removal of the solvent *in vacuo*, the residue was purified by silica gel chromatography eluting with  $\text{CH}_2\text{Cl}_2/\text{hexane}$  (2/5). After removal of the solvent *in vacuo*, recrystallization from  $\text{CHCl}_3/\text{CH}_3\text{CN}$  gave **S5** (0.15 g, 0.93 mmol, 83%).

$^1\text{H}$  NMR (500 MHz, toluene- $d_8$ / $\text{CS}_2$  (1/1), 298 K):  $\delta$  = 10.98 (s, 2H, *meso*), 9.48 (s, 2H,  $\beta$ ), 9.33 (d,  $J$  = 4.5 Hz, 2H,  $\beta$ ), 8.95–8.97 (m, 4H,  $\beta$ ), 8.90 (d,  $J$  = 4.5 Hz, 2H,  $\beta$ ), 8.84 (d,  $J$  = 4.5 Hz, 2H,  $\beta$ ), 8.79 (d,  $J$  = 4.5 Hz, 2H,  $\beta$ ), 8.15 (d,  $J$  = 2.0 Hz, 4H, Ar-*o*) 7.18 (t,  $J$  = 2.0 Hz, 2H, Ar-*p*), 7.31 (s, 4H, Mes), 7.24 (s, 4H, Mes), 2.65 (s, 6H, Mes), 2.60 (s, 6H, Mes), 2.04 (s, 12H, Mes), 1.96 (s, 12H, Mes), 1.54 (s, 36H, *t*-Bu) ppm;  $^{13}\text{C}$  NMR (126 MHz, toluene- $d_8$ / $\text{CS}_2$  (1/1), 298 K):  $\delta$  = 151.1, 150.9, 150.8, 150.8, 150.4, 150.3, 148.8, 148.8, 142.7, 139.6, 139.5, 139.4, 137.9, 137.7, 137.3, 137.2, 133.6, 133.4, 131.8, 131.2, 131.1, 130.2, 128.5, 127.7, 127.3, 125.7, 124.8, 122.7, 121.2, 119.7, 119.1, 104.3, 94.9, 35.2, 32.1, 22.4, 22.4, 22.1, 22.0 ppm; HRMS (MALDI):  $[\text{M}]^+$  Calcd for  $\text{C}_{106}\text{H}_{102}\text{N}_8\text{Zn}_2$  1618.6798; Found 1618.6845.

**1,2-Bis(2-(20-bromo-10-bis(3,5-di-*tert*-butylphenyl)-5,15-mesityl)Ni(II)porphyrinyl)acetylene **2b****

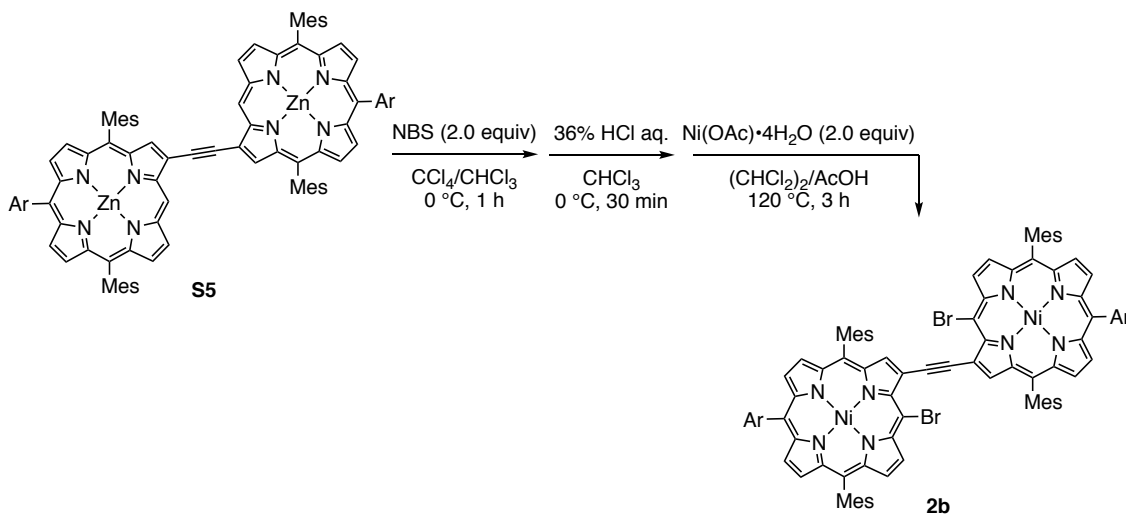

A round-bottomed flask containing **S5** (0.29 g, 0.180 mmol) was charged with CCl<sub>4</sub> (150 mL) and CHCl<sub>3</sub> (150 mL). The reaction mixture was cooled to 0 °C. To the flask, a solution of *N*-bromosuccinimide (64 mg, 0.360 mmol) in CHCl<sub>3</sub> (30 mL) was added. After stirring at 0 °C for 1 h, the reaction mixture was quenched with a sufficient amount of acetone. The product was passed through alumina pad eluting with CHCl<sub>3</sub>. After removal of the solvent *in vacuo*, the crude mixture was dissolved in CHCl<sub>3</sub> (270 mL). To the resulting solution, 36% HCl aq. (18 drops) was added. After stirring at room temperature for 30 min, the reaction mixture was quenched with a sufficient amount of NaHCO<sub>3</sub> solution at 0 °C. The product was extracted with CHCl<sub>3</sub>, washed with brine, and dried over Na<sub>2</sub>SO<sub>4</sub>. After removal of the solvent *in vacuo*, the residue passed through short silica column eluting with CHCl<sub>3</sub>. After removal of the solvent *in vacuo*, the crude mixture was dissolved in 1,1,2,2-tetrachloroethane (100 mL) and AcOH (10 mL). To the resulting solution, nickel(II) acetate tetrahydrate (0.50 g, 2.0 mmol) was added. After stirring at 120 °C for 3 h, the reaction mixture was quenched with a sufficient amount of NaHCO<sub>3</sub> solution. The product was extracted with CHCl<sub>3</sub>, washed with brine, and dried over Na<sub>2</sub>SO<sub>4</sub>. After removal of the solvent *in vacuo*, the residue was purified by silica gel chromatography eluting with CH<sub>2</sub>Cl<sub>2</sub>/hexane (1/5). After removal of the solvent *in vacuo*, recrystallization from CH<sub>2</sub>Cl<sub>2</sub>/MeOH gave **2b** (0.23 g, 0.13 mmol, 74%).

<sup>1</sup>H NMR (500 MHz, CDCl<sub>3</sub>, 298 K): δ = 9.65 (d, *J* = 4.5 Hz, 2H, β), 9.13 (s, 2H, β), 8.75–8.71 (m, 4H, β), 8.63 (d, *J* = 5.0 Hz, 2H, β), 8.57 (d, *J* = 4.5 Hz, 2H, β), 8.55 (d, *J* = 4.5 Hz, 2H,



$\beta$ ), 7.91 (d,  $J = 2.0$  Hz, 4H, Ar-*o*) 7.75 (t,  $J = 1.5$  Hz, 2H, Ar-*p*), 7.28 (s, 4H, Mes), 7.24 (s, 4H, Mes), 2.61 (s, 6H, Mes), 2.59 (s, 6H, Mes), 1.96 (s, 12H, Mes), 1.90 (s, 12H, Mes), 1.51 (s, 36H, *t*-Bu) ppm;  $^{13}\text{C}$  NMR (126 MHz,  $\text{CDCl}_3$ , 298 K):  $\delta = 149.2, 144.0, 143.8, 143.6, 142.8, 142.8, 142.6, 140.4, 139.6, 139.6, 139.1, 139.1, 138.1, 138.0, 137.7, 136.7, 136.7, 135.1, 133.7, 133.5, 132.4, 132.1, 131.9, 128.9, 128.1, 128.0, 128.0, 121.4, 120.5, 118.0, 117.8, 101.6, 97.9, 35.2, 31.8, 21.6, 21.6, 21.5, 21.5$  ppm; HRMS (MALDI):  $[\text{M}]^+$  Calcd for  $\text{C}_{106}\text{H}_{100}^{79}\text{Br}_2\text{N}_8\text{Ni}_2$  1762.5122; Found 1762.5147.

### Cyclobutane-linked tetraporphyrin **4b**

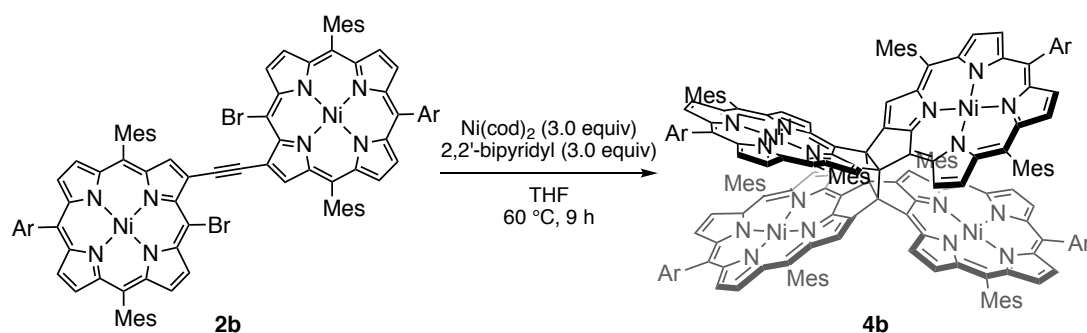

A Schlenk tube containing **2b** (53 mg, 30  $\mu\text{mol}$ ) was charged with dry THF (9.0 mL). To the tube, a solution of bis(1,5-cyclooctadiene)nickel(0) (26 mg, 90  $\mu\text{mol}$ ) and 2,2'-bipyridyl (14 mg, 90  $\mu\text{mol}$ ) in dry THF (9.0 mL) was added. The reaction mixture was stirred at  $60\text{ }^\circ\text{C}$  for 9 h. After removal of the solvent *in vacuo*, the residue was separated by silica gel chromatography eluting with  $\text{CH}_2\text{Cl}_2$ /hexane (1:5). After removal of the solvent *in vacuo*, recrystallization from  $\text{CH}_2\text{Cl}_2$ /MeOH gave **4b** (9.1 mg, 2.8  $\mu\text{mol}$ , 57%).

$^1\text{H}$  NMR (500 MHz,  $\text{CDCl}_3$ , 298 K):  $\delta = 10.17$  (d,  $J = 4.5$  Hz, 4H,  $\beta$ ), 8.95 (s, 4H,  $\beta$ ), 8.49 (d,  $J = 4.5$  Hz, 4H,  $\beta$ ), 8.38 (d,  $J = 4.5$  Hz, 4H,  $\beta$ ), 8.36 (d,  $J = 4.5$  Hz, 4H,  $\beta$ ), 8.20–8.22 (m, 8H,  $\beta$ ), 7.83 (s, 4H, Ar-*o*), 7.56 (s, 4H, Ar-*p*), 7.30 (s, 4H, Ar-*o*), 7.22 (s, 4H, Mes), 7.16 (s, 4H, Mes), 7.09 (s, 4H, Mes), 7.05 (s, 4H, Mes), 2.68 (s, 12H, Mes), 2.62 (s, 12H, Mes), 1.36 (s, 36H, *t*-Bu), 1.31 (s, 12H, Mes), 1.28 (s, 36H, *t*-Bu), 1.24 (s, 12H, Mes), 1.15 (s, 12H, Mes), 1.12 (s, 12H, Mes) ppm;  $^{13}\text{C}$  NMR (126 MHz,  $\text{CDCl}_3$ , 298 K):  $\delta = 153.7, 151.0, 148.7, 148.6, 146.0, 143.5, 143.0, 142.7, 142.5, 142.3, 142.3, 140.4, 139.2, 138.9, 138.0, 137.5, 137.4, 136.7, 132.0, 131.8, 131.6, 130.3, 130.1, 129.2, 128.8, 128.2, 127.9, 127.6, 127.6, 121.6, 120.7, 120.2, 118.3, 117.4, 117.3, 76.5, 35.0, 35.0, 31.7, 31.7, 21.7, 21.6, 21.5, 21.4, 21.2, 21.1$  ppm (Some signals

were overlapped.); UV/Vis absorption (CH<sub>2</sub>Cl<sub>2</sub>):  $\lambda_{\max}$  ( $\epsilon/M^{-1} \text{ cm}^{-1}$ ) = 397 ( $4.2 \times 10^5$ ), 431 ( $2.8 \times 10^5$ ), and 539 ( $8.0 \times 10^4$ ) nm; HRMS (ESI):  $[M+H]^+$  Calcd for C<sub>212</sub>H<sub>200</sub>N<sub>16</sub>Ni<sub>4</sub> 3206.3650; Found 3206.3571.

### Diketodiporphyrin **5**

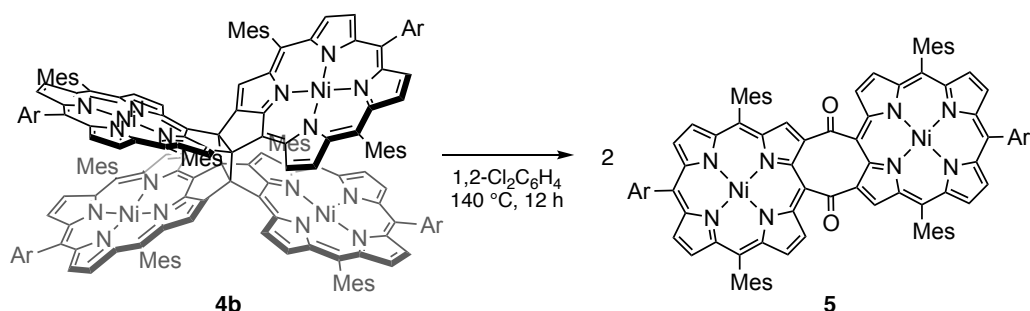

A test tube containing **4b** (5.0 mg, 1.6  $\mu\text{mol}$ ) was charged with 1,2-Cl<sub>2</sub>C<sub>6</sub>H<sub>4</sub> (3.0 mL). The tube was heated at 140 °C for 12 h. After cooling to room temperature, hexane (15 mL) was added to the solution. The resulting solution was passed through short silica column eluting with CH<sub>2</sub>Cl<sub>2</sub>. After removal of the solvent *in vacuo*, the residue was separated by silica gel chromatography eluting with CH<sub>2</sub>Cl<sub>2</sub>/hexane (2:1). After removal of the solvent *in vacuo*, recrystallization from CH<sub>2</sub>Cl<sub>2</sub>/MeOH gave **5** (3.3 mg, 2.0  $\mu\text{mol}$ , 65%).

<sup>1</sup>H NMR (500 MHz, CDCl<sub>3</sub>, 253 K):  $\delta$  = 9.61 (d,  $J$  = 5.0 Hz, 2H,  $\beta$ ), 8.73 (s, 2H,  $\beta$ ), 8.73 (d,  $J$  = 5.5 Hz, 2H,  $\beta$ ), 8.67 (d,  $J$  = 5.0 Hz, 2H,  $\beta$ ), 8.55 (d,  $J$  = 5.0 Hz, 2H,  $\beta$ ), 8.49 (d,  $J$  = 5.0 Hz, 2H,  $\beta$ ), 8.35 (d,  $J$  = 5.0 Hz, 2H,  $\beta$ ), 8.13 (s, 2H, Ar-*o*), 7.61 (t,  $J$  = 1.8 Hz, 2H, Ar-*p*), 7.32 (s, 2H, Mes), 7.30 (s, 2H, Ar-*o*), 7.13 (s, 2H, Mes), 7.10 (s, 2H, Mes), 7.06 (s, 2H, Mes), 2.58 (s, 6H, Mes), 2.50 (s, 6H, Mes), 2.20 (s, 6H, Mes), 1.80 (s, 6H, Mes), 1.46 (s, 18H, *t*-Bu), 1.44 (s, 6H, Mes), 1.34 (s, 6H, Mes), 1.26 (s, 18H, *t*-Bu) ppm; <sup>13</sup>C NMR (126 MHz, CDCl<sub>3</sub>, 298 K):  $\delta$  = 200.2, 192.7, 149.1, 146.8, 144.0, 143.7, 143.6, 143.3, 143.0, 139.8, 139.2, 139.2, 139.1, 138.9, 138.7, 138.2, 138.1, 136.6, 136.0, 134.1, 133.9, 133.5, 133.3, 131.9, 131.7, 131.6, 130.9, 128.8, 128.1, 128.1, 128.0, 127.9, 122.2, 121.4, 119.7, 118.4, 115.3, 35.1, 31.7, 21.7, 21.6, 21.6, 21.5, 21.4, 21.3 ppm (Some signals were overlapped.); HRMS (MALDI):  $[M]^+$  Calcd for C<sub>106</sub>H<sub>100</sub>N<sub>8</sub>Ni<sub>2</sub>O<sub>2</sub> 1635.6756; Found 1635.67940.

### Ethno-fused diporphyrin dication **1b**<sup>2+</sup>

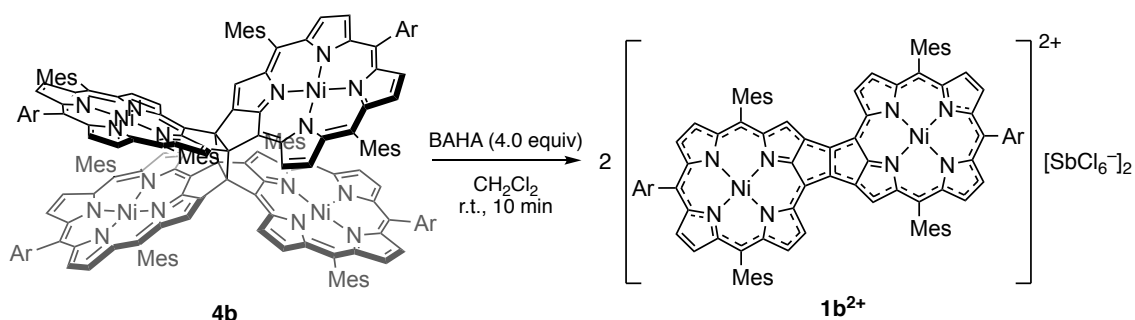

A Schlenk tube containing **4b** (9.6 mg, 3.0  $\mu\text{mol}$ ) was charged with CH<sub>2</sub>Cl<sub>2</sub> (10 mL). To the solution, tris(4-bromophenyl)aminium hexachloroantimonate (9.8 mg, 12  $\mu\text{mol}$ ) was added. After stirring at room temperature for 10 min, hexane (10 mL) was added to the solution. After removal of the half amount of solvent *in vacuo*, reprecipitation gave **1b**<sup>2+</sup> (12 mg, 5.4  $\mu\text{mol}$ , 89%).

<sup>1</sup>H NMR (500 MHz, CDCl<sub>3</sub>, 298 K):  $\delta$  = 9.00 (d,  $J$  = 4.0 Hz, 2H,  $\beta$ ), 8.92 (s, 2H,  $\beta$ ), 8.14 (d,  $J$  = 4.5 Hz, 2H,  $\beta$ ), 7.83 (d,  $J$  = 5.0 Hz, 2H,  $\beta$ ), 7.81 (d,  $J$  = 5.0 Hz, 2H,  $\beta$ ), 7.71–7.72 (m, 4H,  $\beta$  + Ar-*p*), 7.67 (d,  $J$  = 5.0 Hz, 2H,  $\beta$ ), 7.62 (d,  $J$  = 1.5 Hz, 4H, Ar-*o*), 7.23 (s, 4H, Mes), 7.14 (s, 4H, Mes), 2.56 (s, 6H, Mes), 2.50 (s, 6H, Mes), 2.15 (s, 12H, Mes), 2.03 (s, 12H, Mes), 1.44 (s, 36H, *t*-Bu) ppm; <sup>13</sup>C NMR (126 MHz, CDCl<sub>3</sub>, 298 K):  $\delta$  = 170.5, 167.1, 154.0, 152.9, 151.3, 150.8, 150.5, 150.4, 149.7, 149.1, 140.0, 139.5, 139.4, 138.3, 138.0, 138.0, 137.7, 136.4, 136.1, 134.7, 134.4, 134.2, 133.7, 132.2, 131.8, 131.6, 128.9, 128.5, 127.6, 127.5, 123.3, 109.0, 35.2, 31.7, 21.6, 21.5, 21.5, 21.4 ppm; HRMS (MALDI): [M]<sup>+</sup> Calcd for C<sub>106</sub>H<sub>100</sub>N<sub>8</sub>Ni<sub>2</sub> 1602.6779; Found 1602.6708.

### Reduction of ethno-fused diporphyrin dication **1b**<sup>2+</sup>

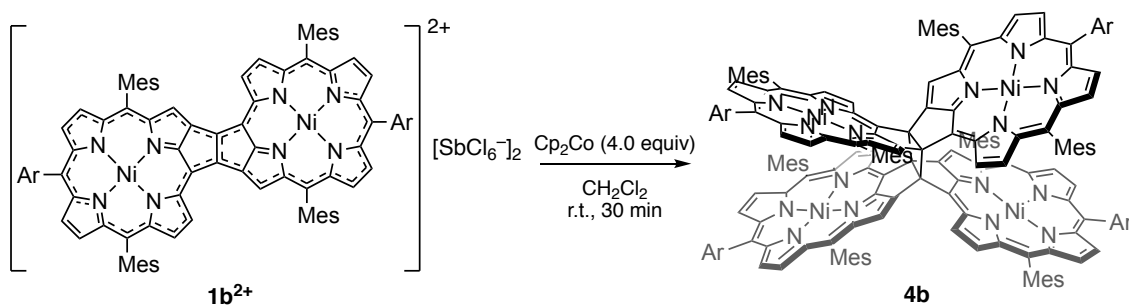

A Schlenk tube containing **1b**<sup>2+</sup> (4.5 mg, 2.0  $\mu\text{mol}$ ) was charged with CH<sub>2</sub>Cl<sub>2</sub> (5 mL). To the

solution, bis(cyclopentadienyl)cobalt(II) (1.5 mg, 8.0  $\mu\text{mol}$ ) was added. The reaction mixture was stirred at room temperature for 30 min. After removal of the solvent *in vacuo*, the residue was separated by silica gel chromatography eluting with  $\text{CH}_2\text{Cl}_2$ /hexane (1:5). After removal of the solvent *in vacuo*, recrystallization from  $\text{CH}_2\text{Cl}_2$ /MeOH gave **4b** (2.6 mg, 0.80  $\mu\text{mol}$ , 80%).

### 3. NMR spectra

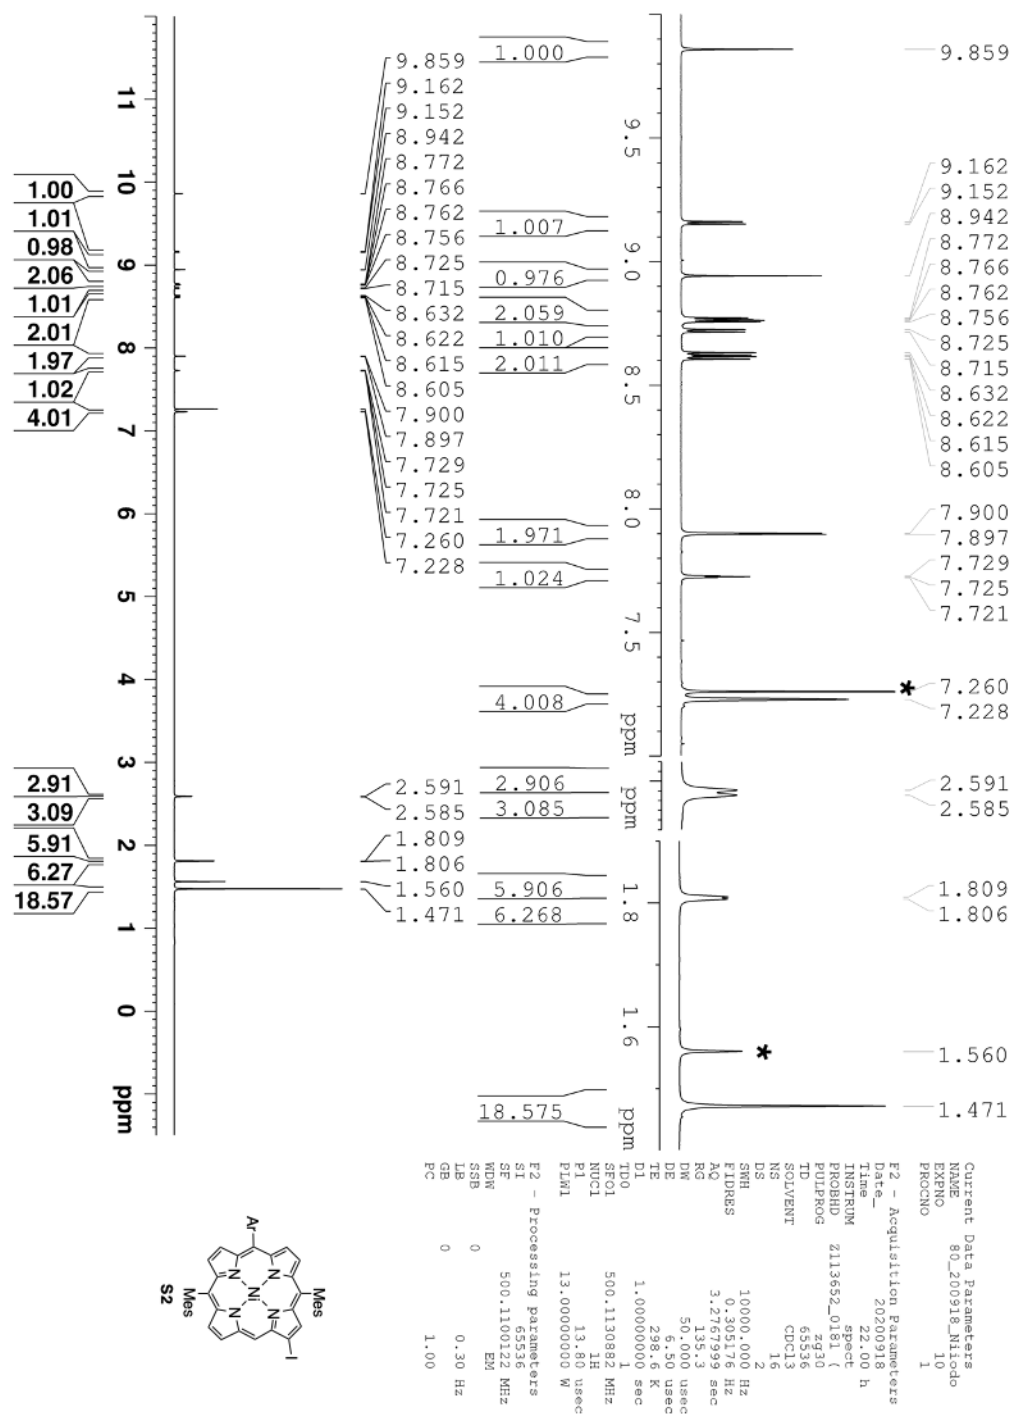

Fig. S1 <sup>1</sup>H NMR spectrum of S2 in CDCl<sub>3</sub> at 25 °C.

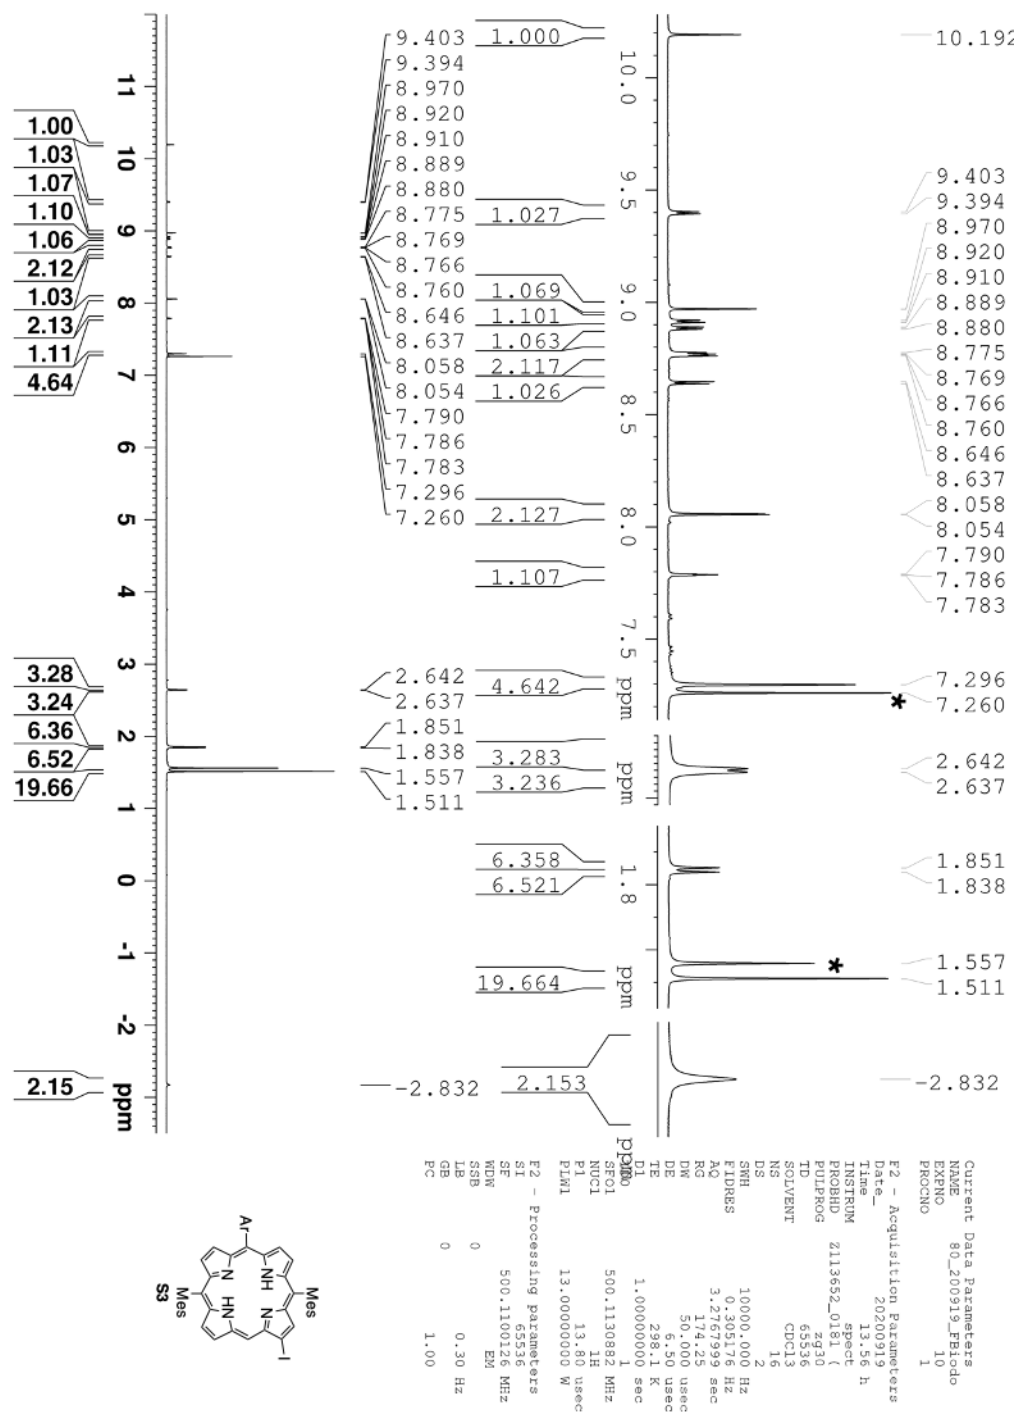

Fig. S2 <sup>1</sup>H NMR spectrum of S3 in CDCl<sub>3</sub> at 25 °C.

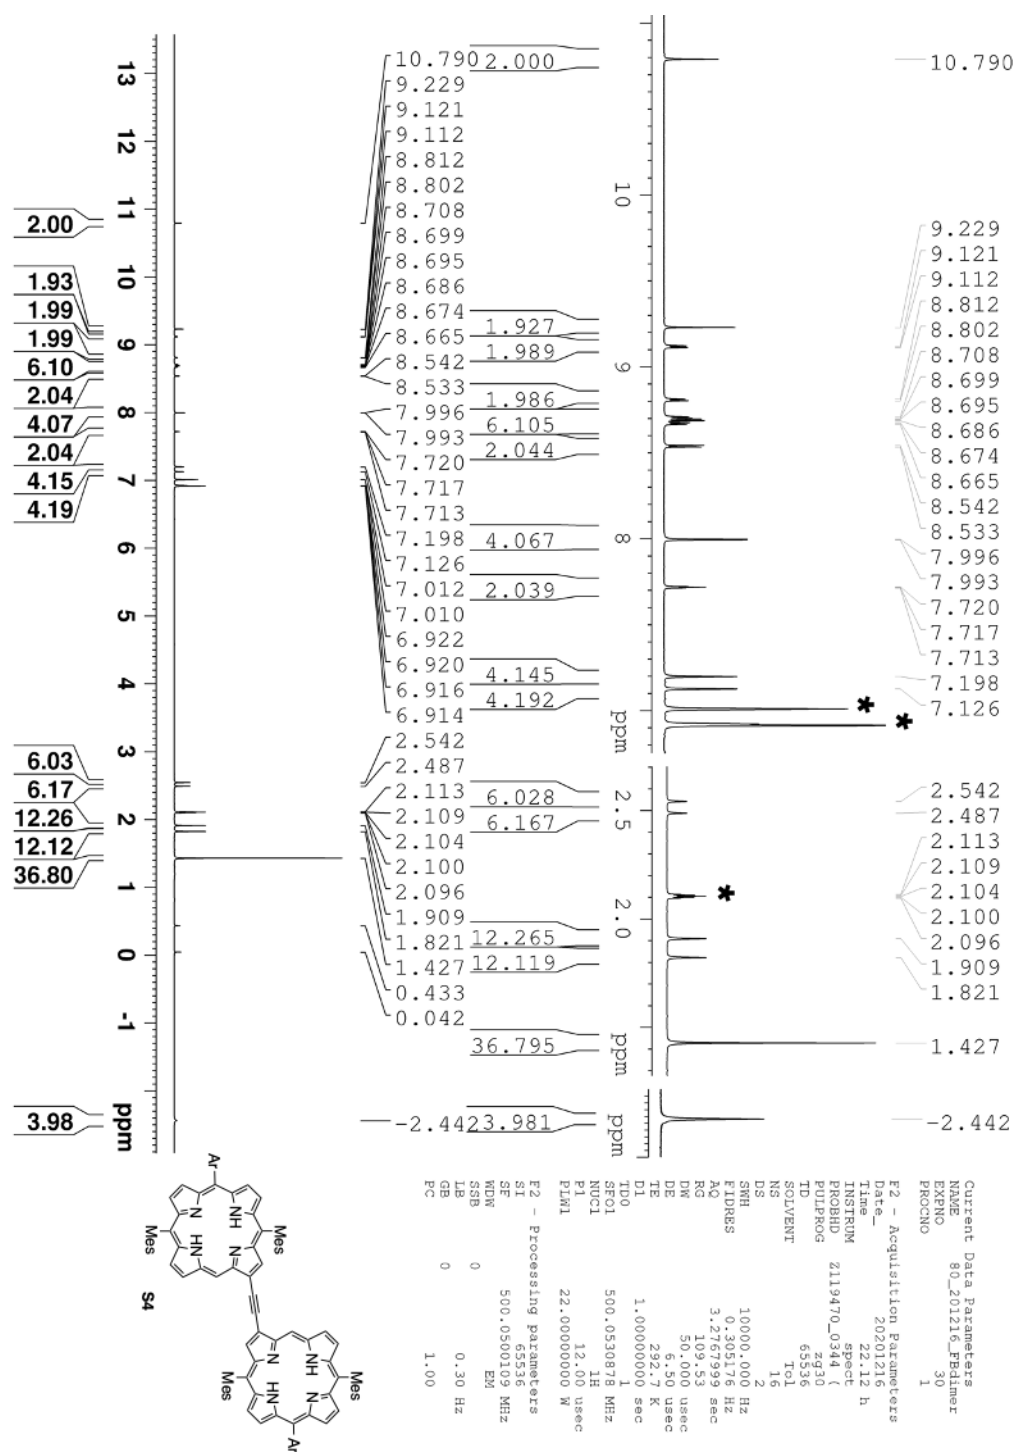

Fig. S3  $^1\text{H}$  NMR spectrum of S4 in toluene- $d_8$ /CS $_2$  (1/1) at 25 °C.





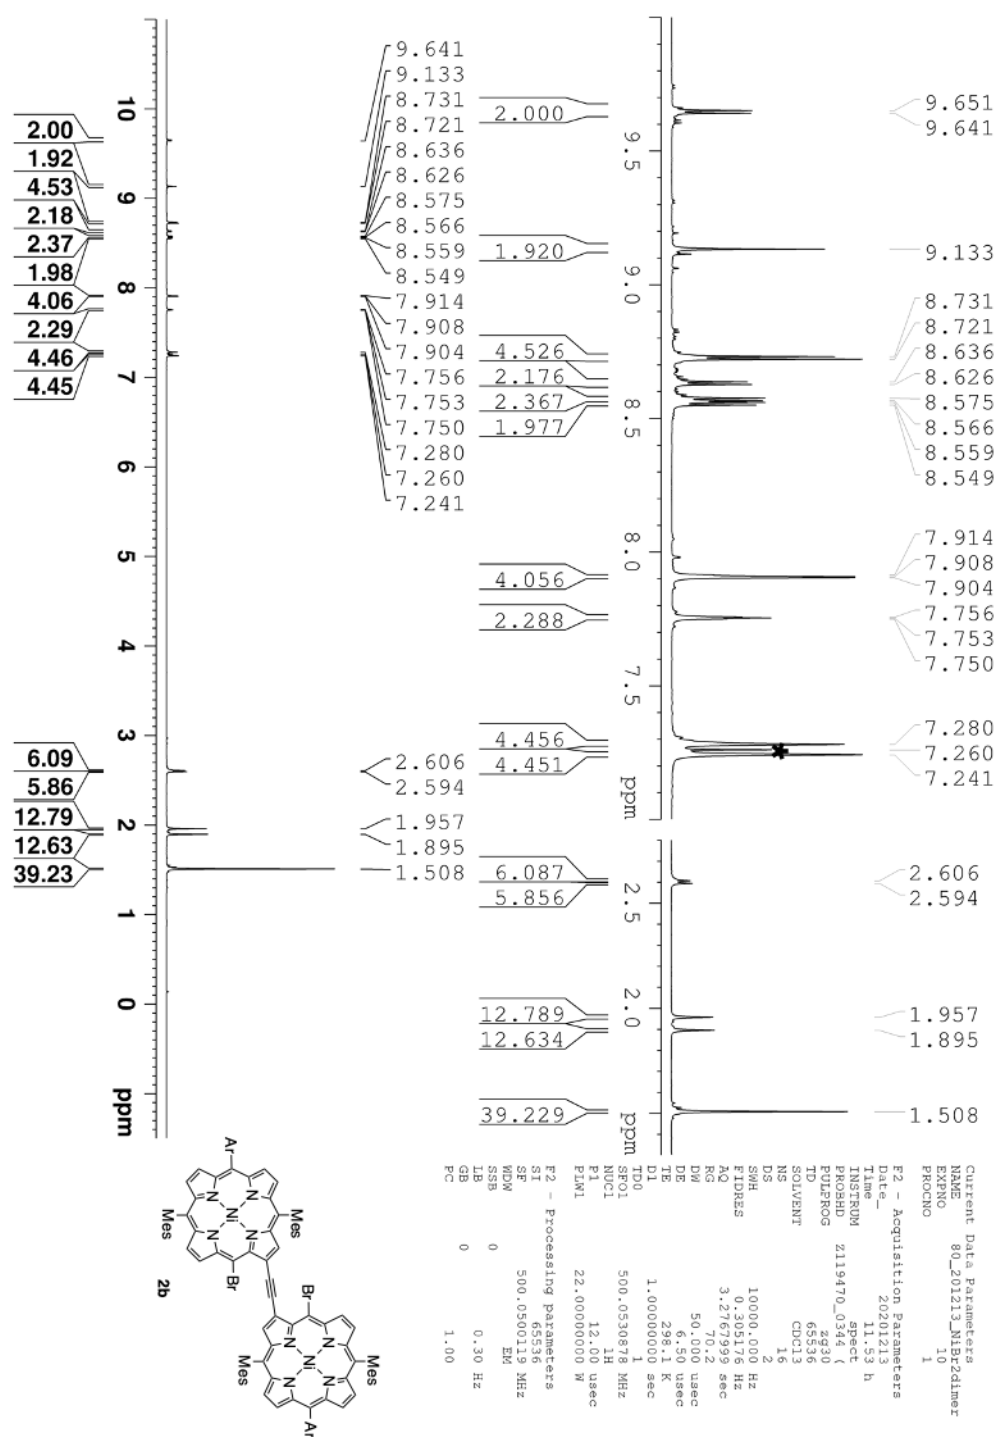

Fig. S5  $^1\text{H}$  NMR spectrum of **2b** in  $\text{CDCl}_3$  at  $25^\circ\text{C}$ .

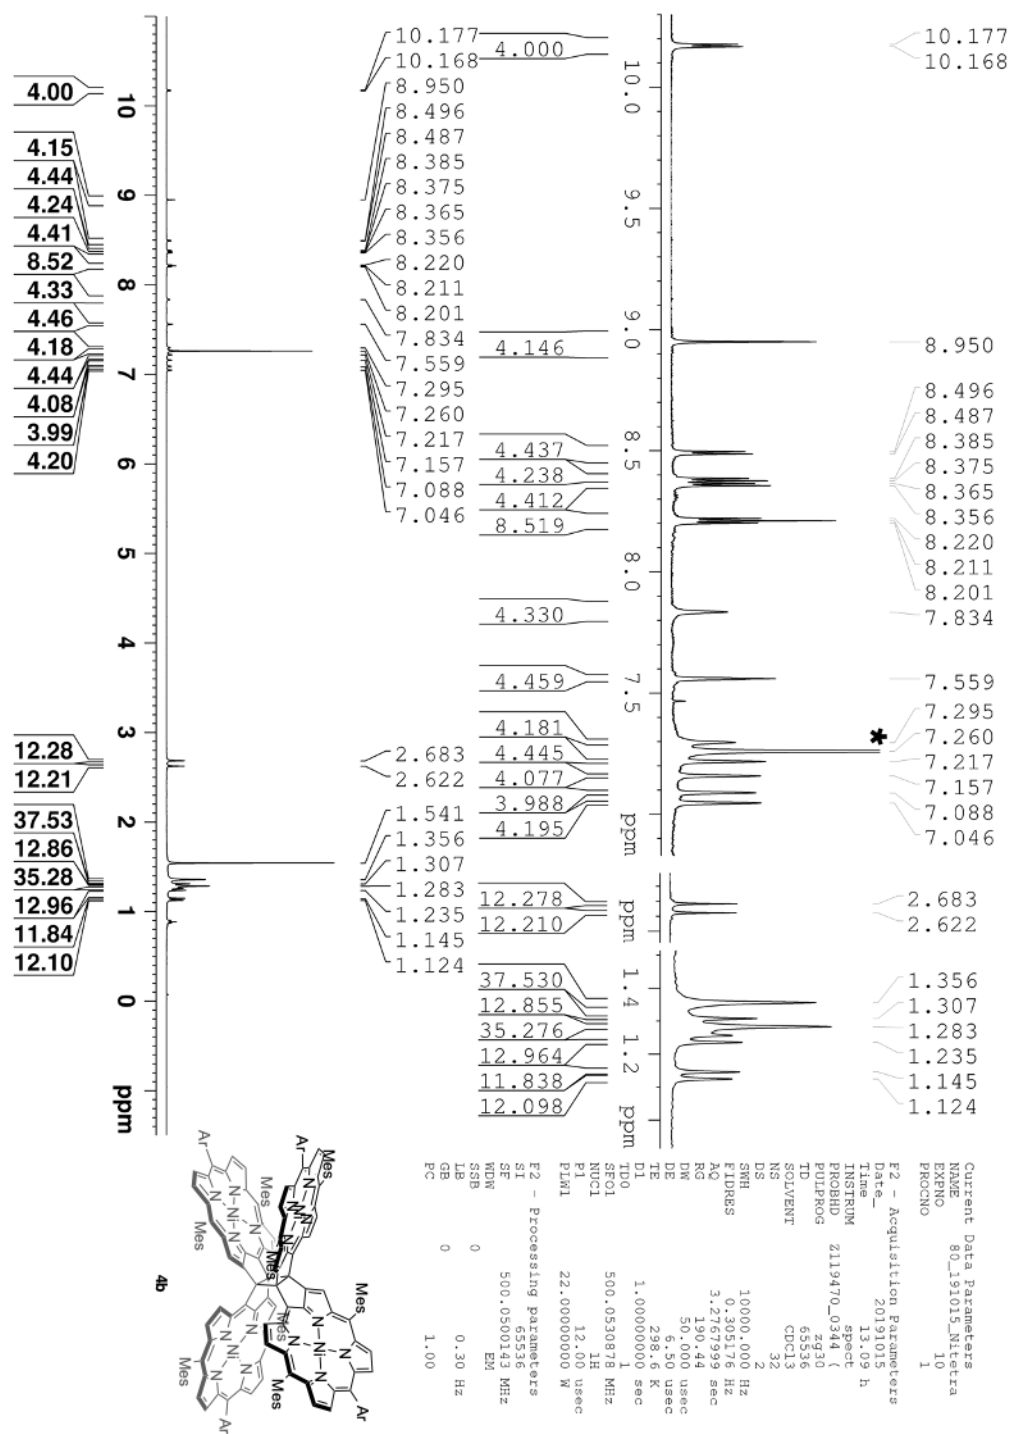

Fig. S6  $^1\text{H}$  NMR spectrum of **4b** in  $\text{CDCl}_3$  at  $25^\circ\text{C}$ .

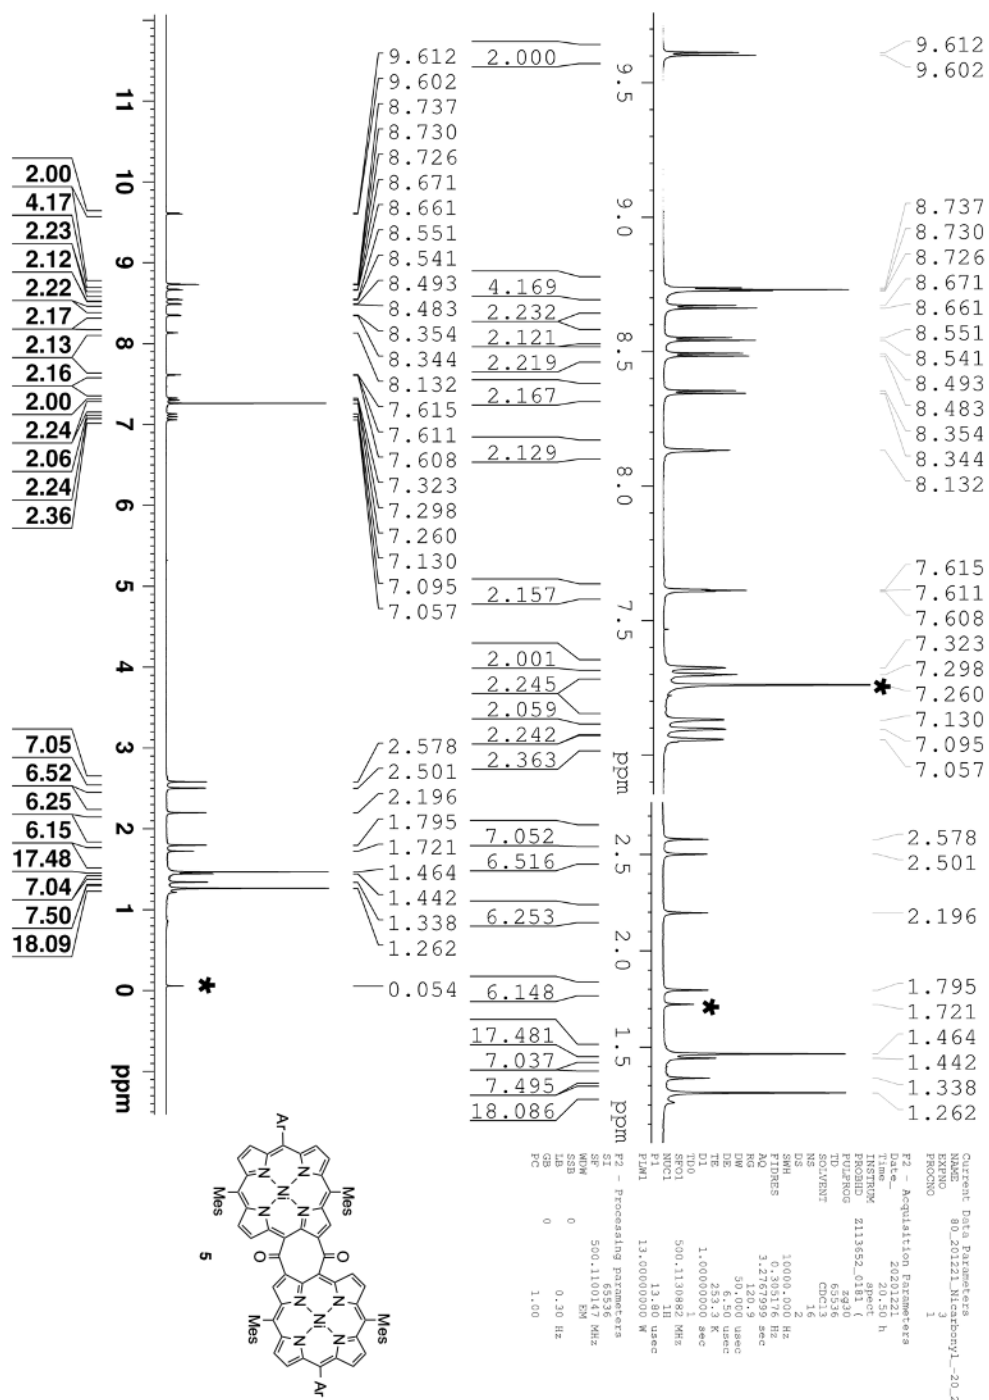

Fig. S7  $^1\text{H}$  NMR spectrum of **5** in  $\text{CDCl}_3$  at  $-20\text{ }^\circ\text{C}$ .

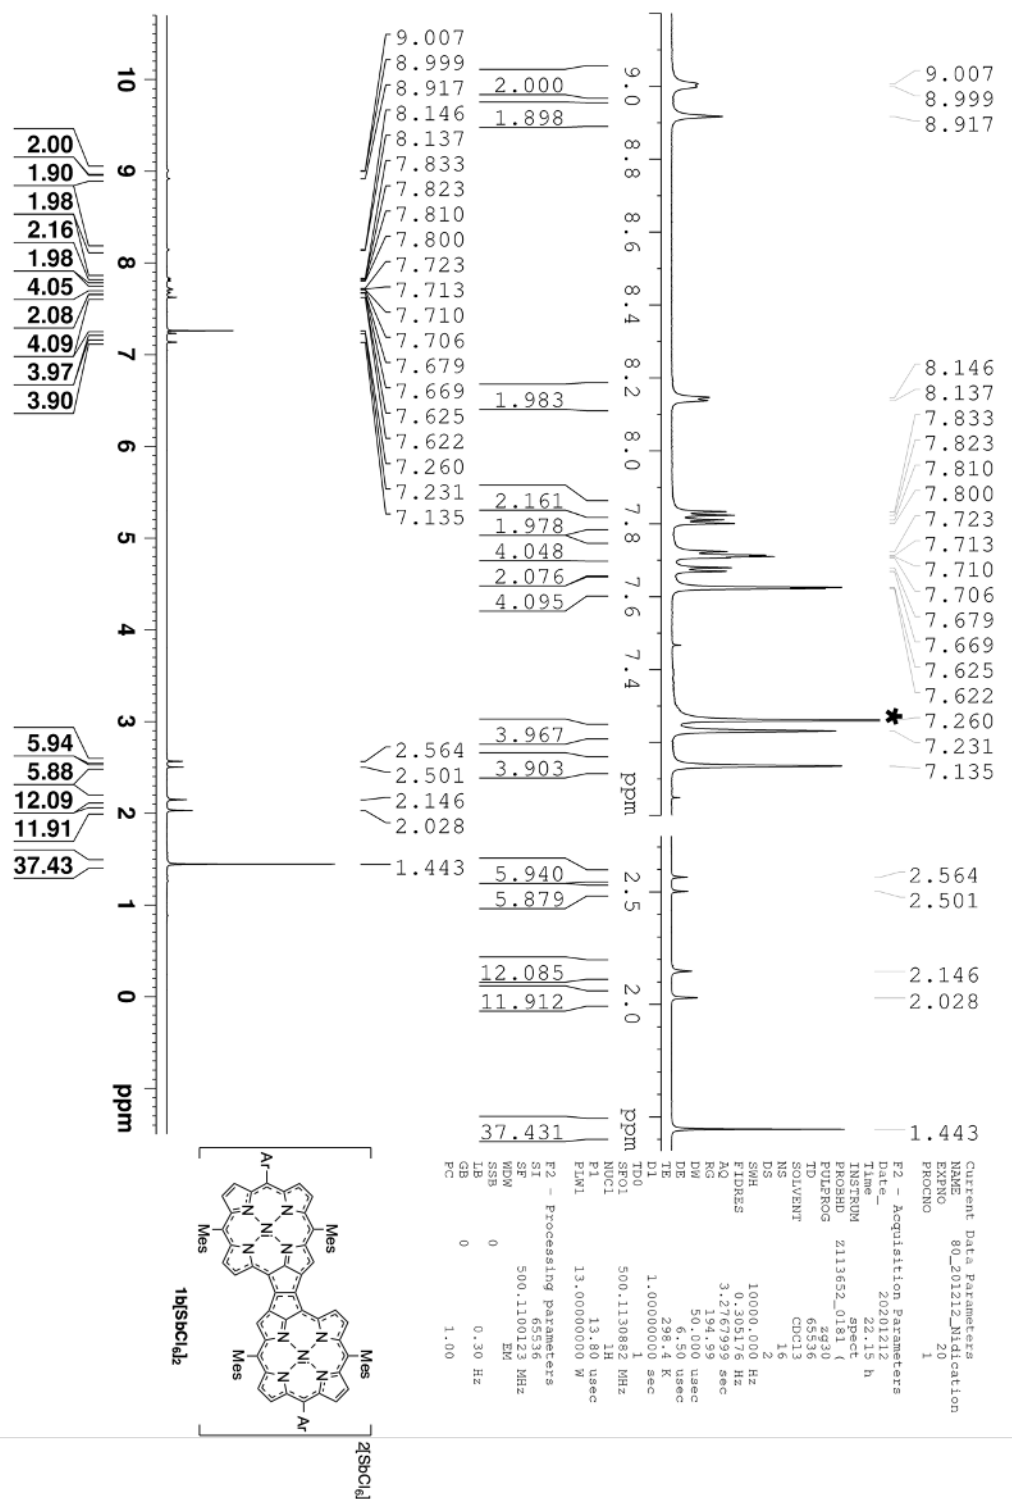

Fig. S8  $^1\text{H}$  NMR spectrum of  $1\text{b}[\text{SbCl}_6]_2$  in  $\text{CDCl}_3$  at  $25^\circ\text{C}$ .

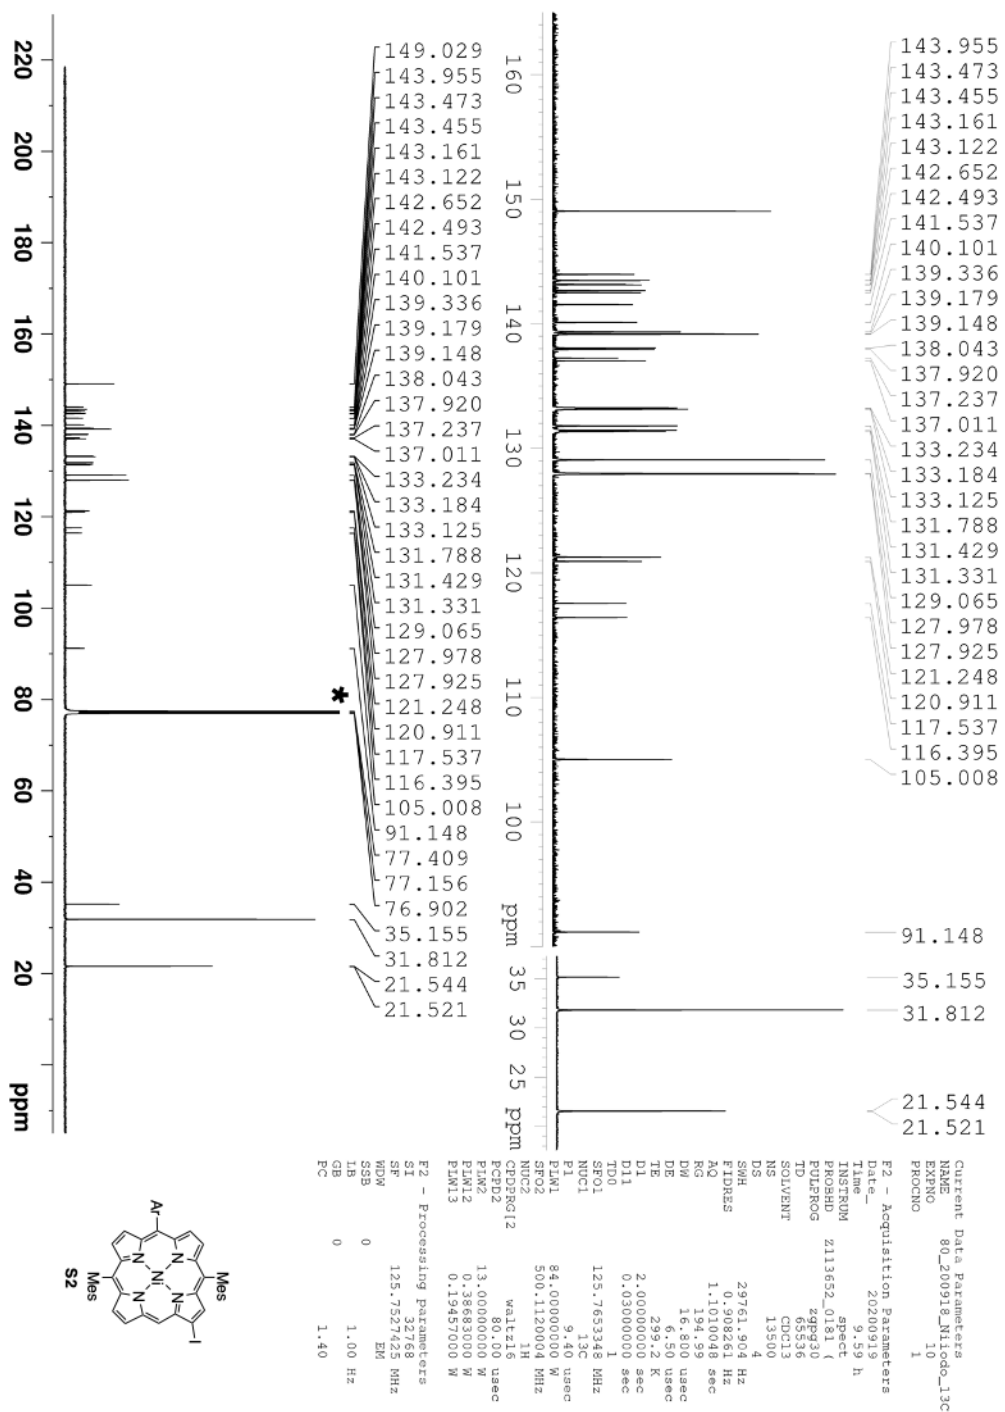

Fig. S9  $^{13}\text{C}$  NMR spectrum of S2 in  $\text{CDCl}_3$  at 25  $^\circ\text{C}$ .

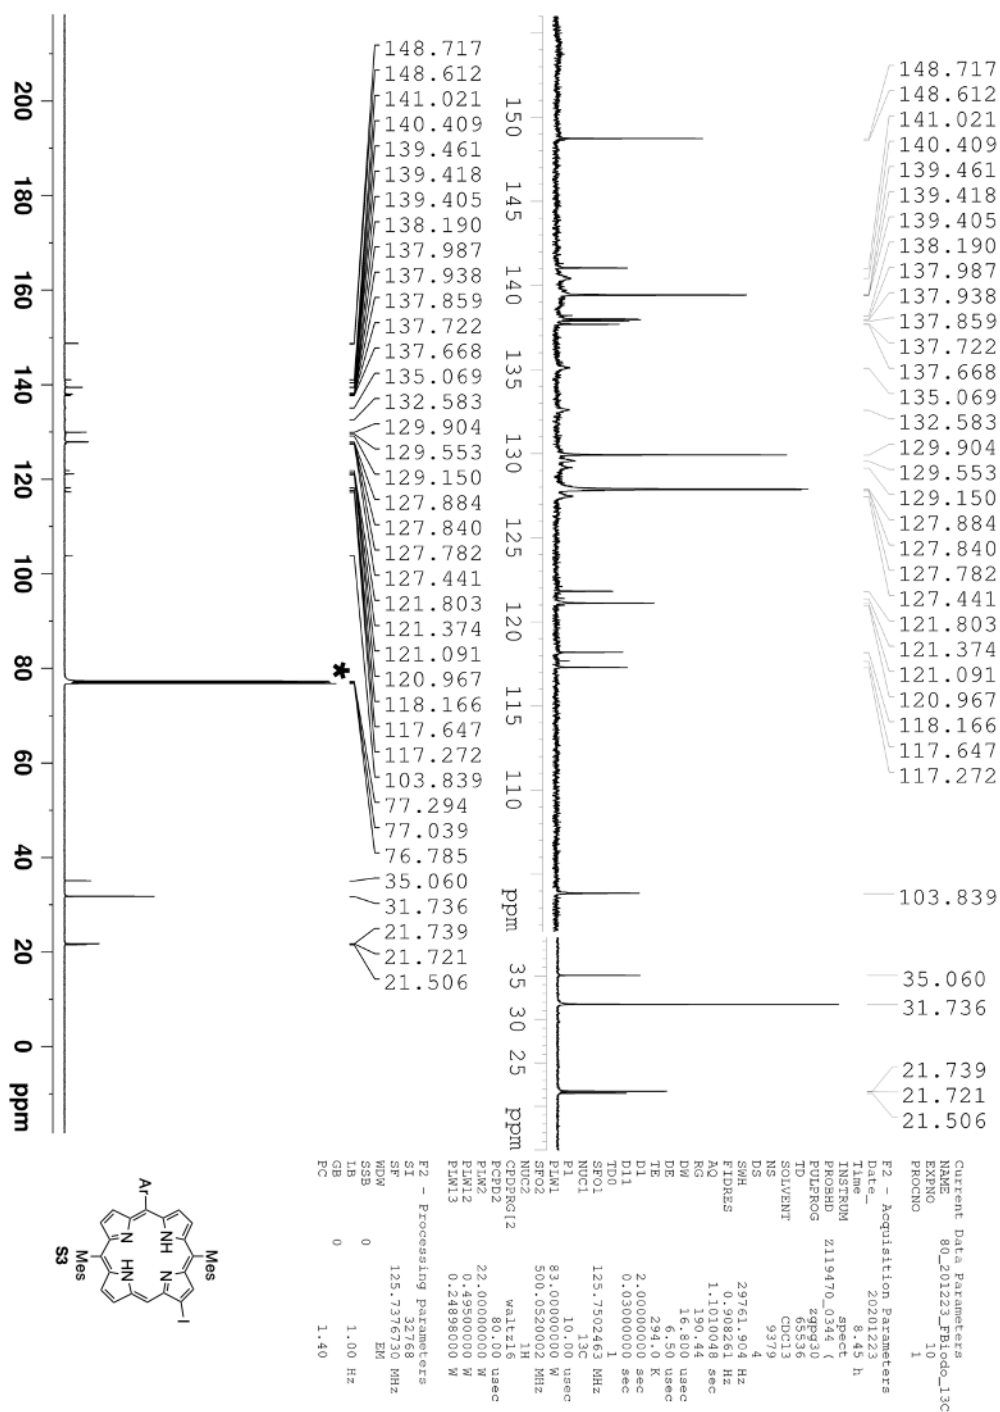

Fig. S10  $^{13}\text{C}$  NMR spectrum of S3 in  $\text{CDCl}_3$  at 25 °C.

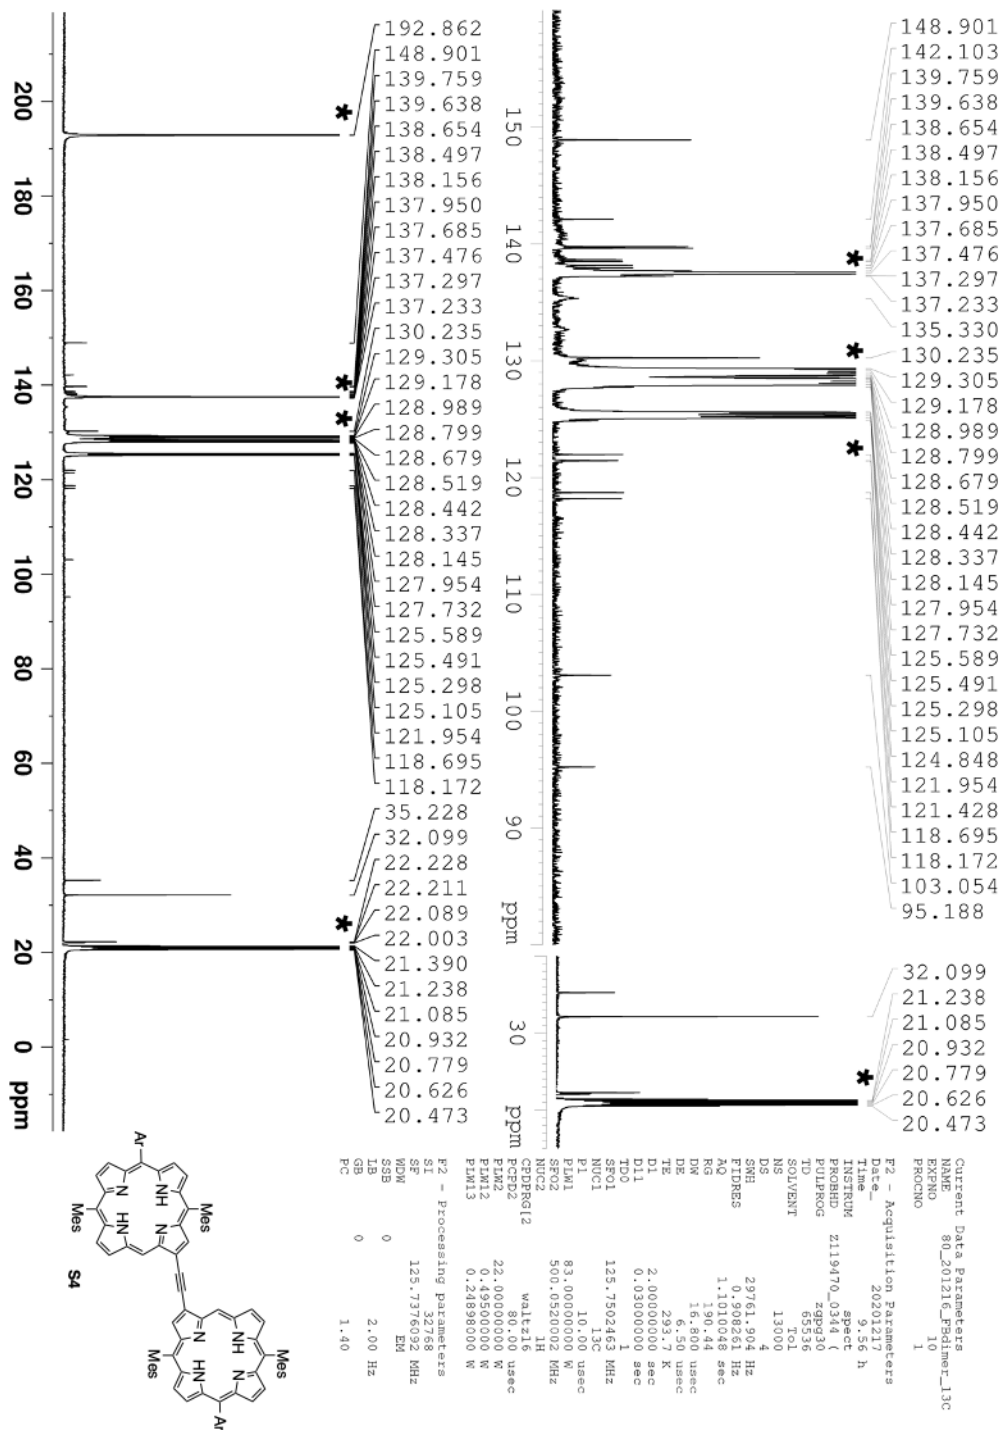

Fig. S11 <sup>13</sup>C NMR spectrum of S4 in toluene-*d*<sub>8</sub>/CS<sub>2</sub> (1/1) at 25 °C.

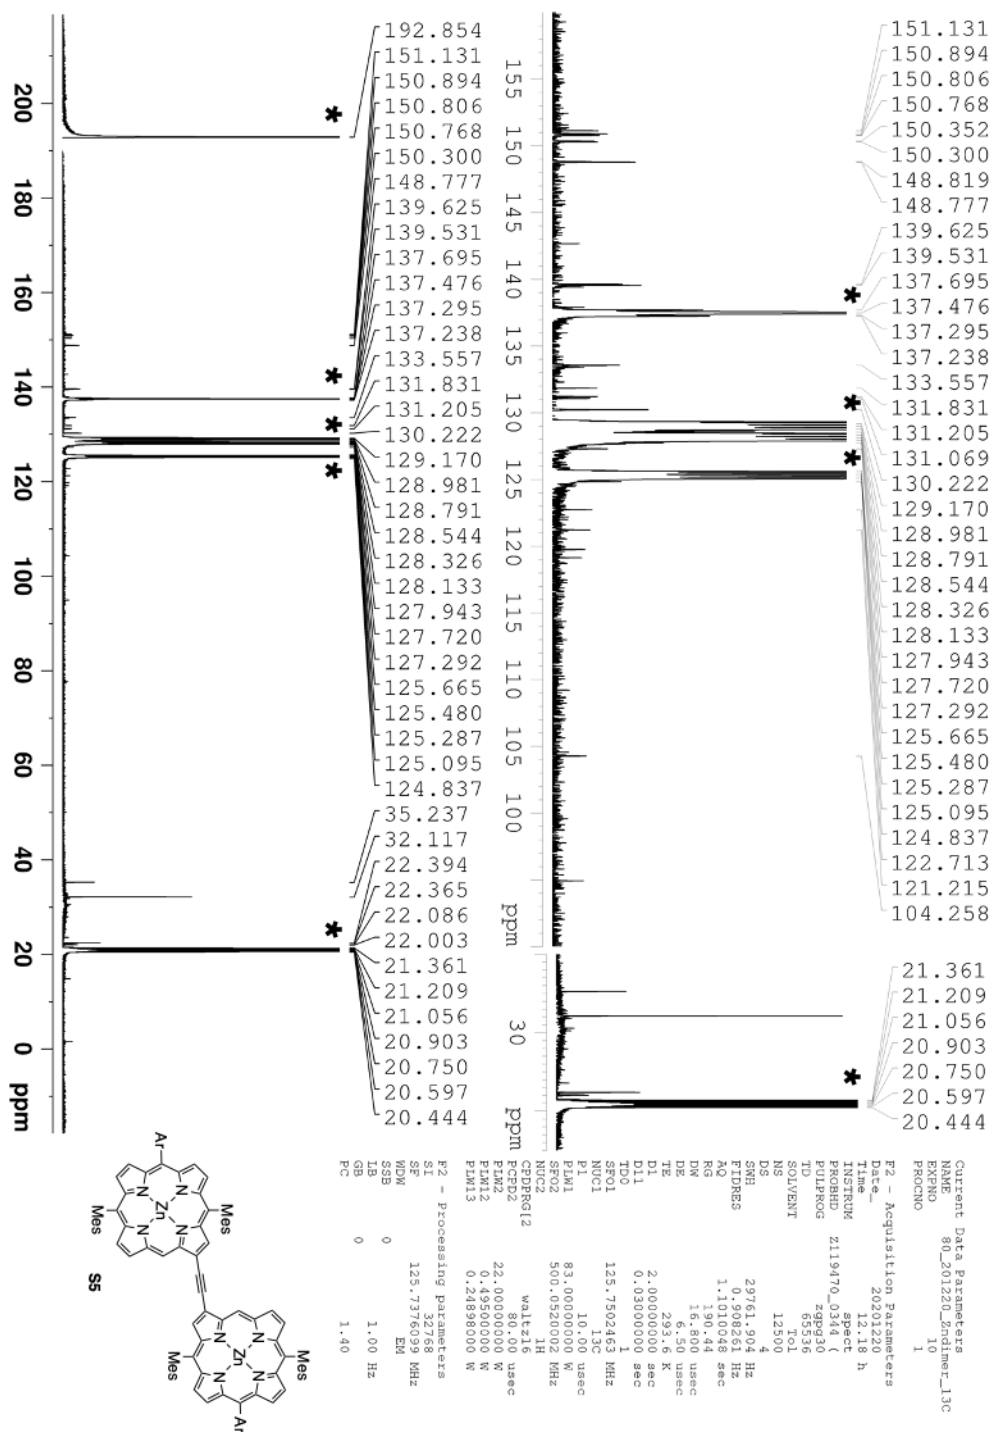

Fig. S12 <sup>13</sup>C NMR spectrum of S5 in toluene-*d*<sub>8</sub>/CS<sub>2</sub> (1/1) at 25 °C.



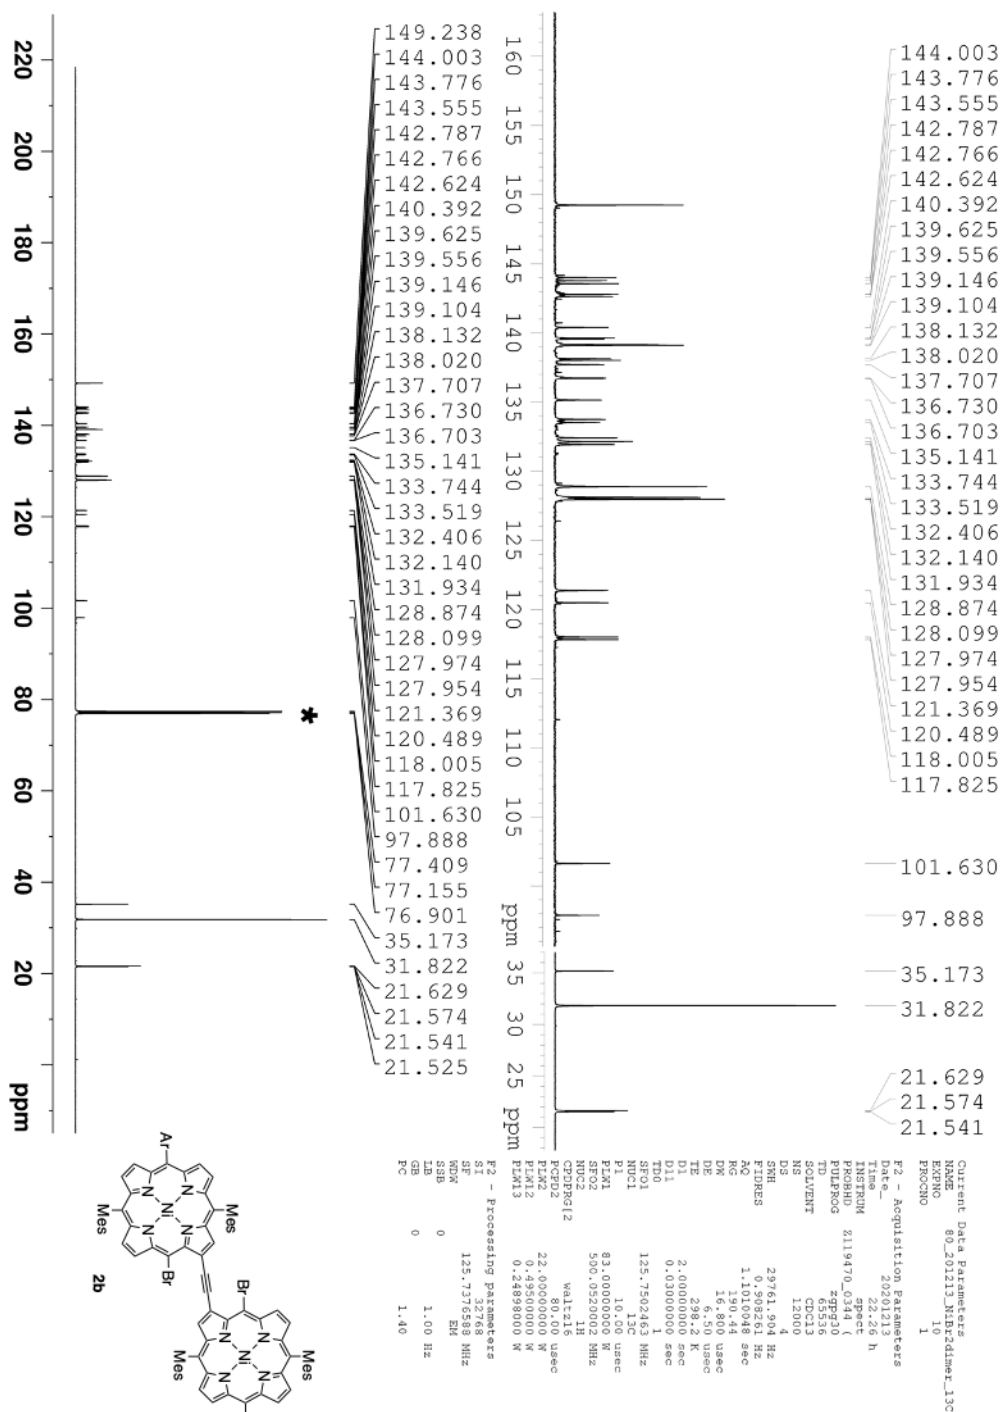

Fig. S13  $^{13}\text{C}$  NMR spectrum of **2b** in  $\text{CDCl}_3$  at 25 °C.

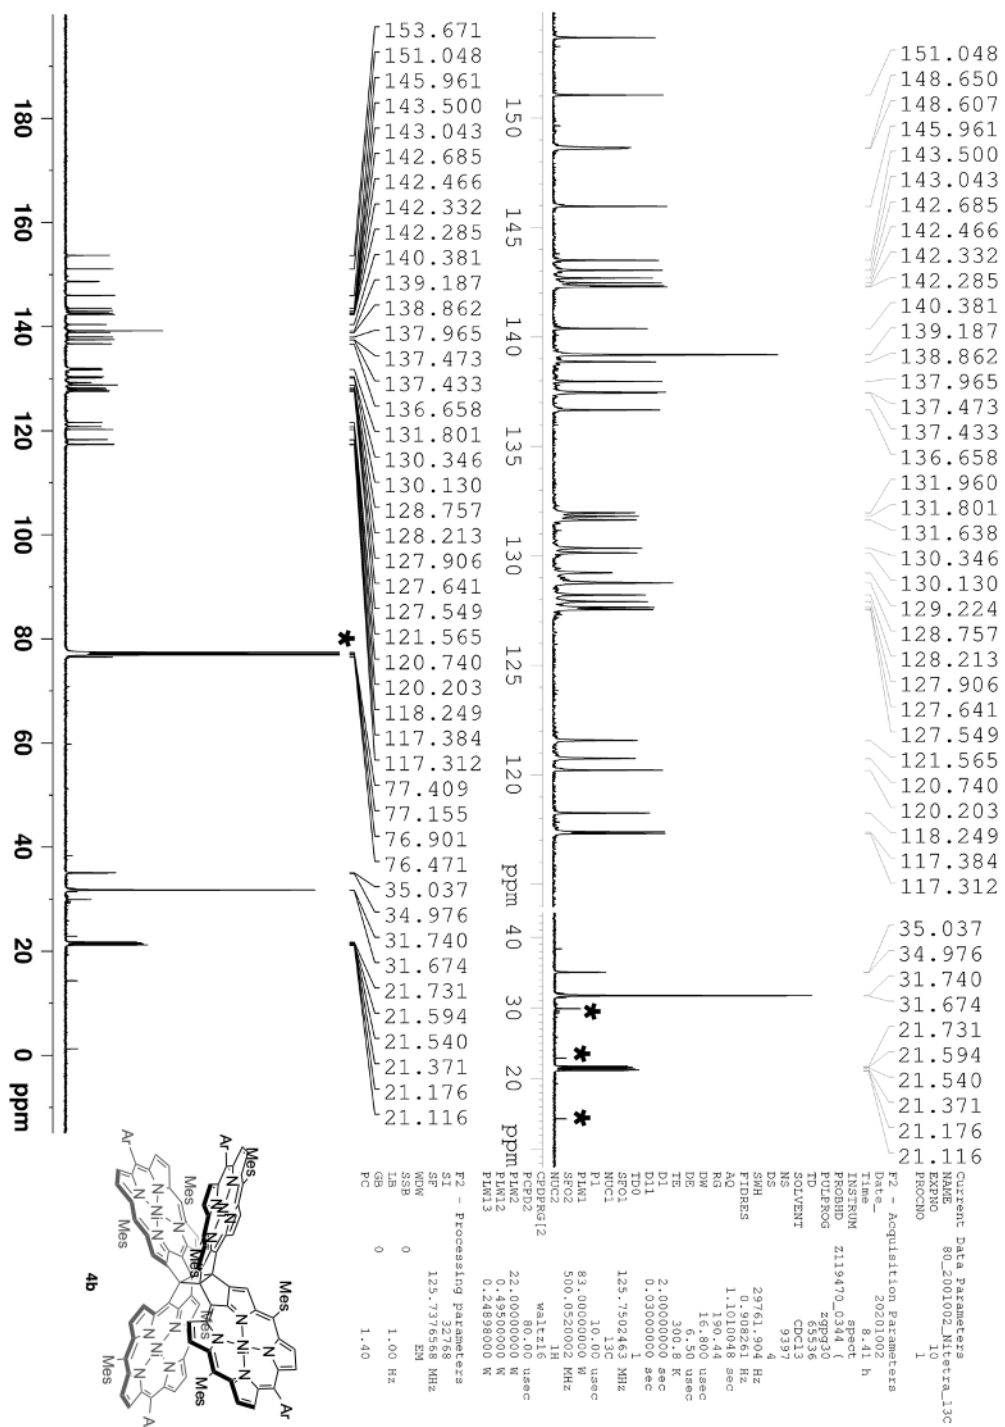

Fig. S14  $^{13}\text{C}$  NMR spectrum of **4b** in  $\text{CDCl}_3$  at 25 °C.



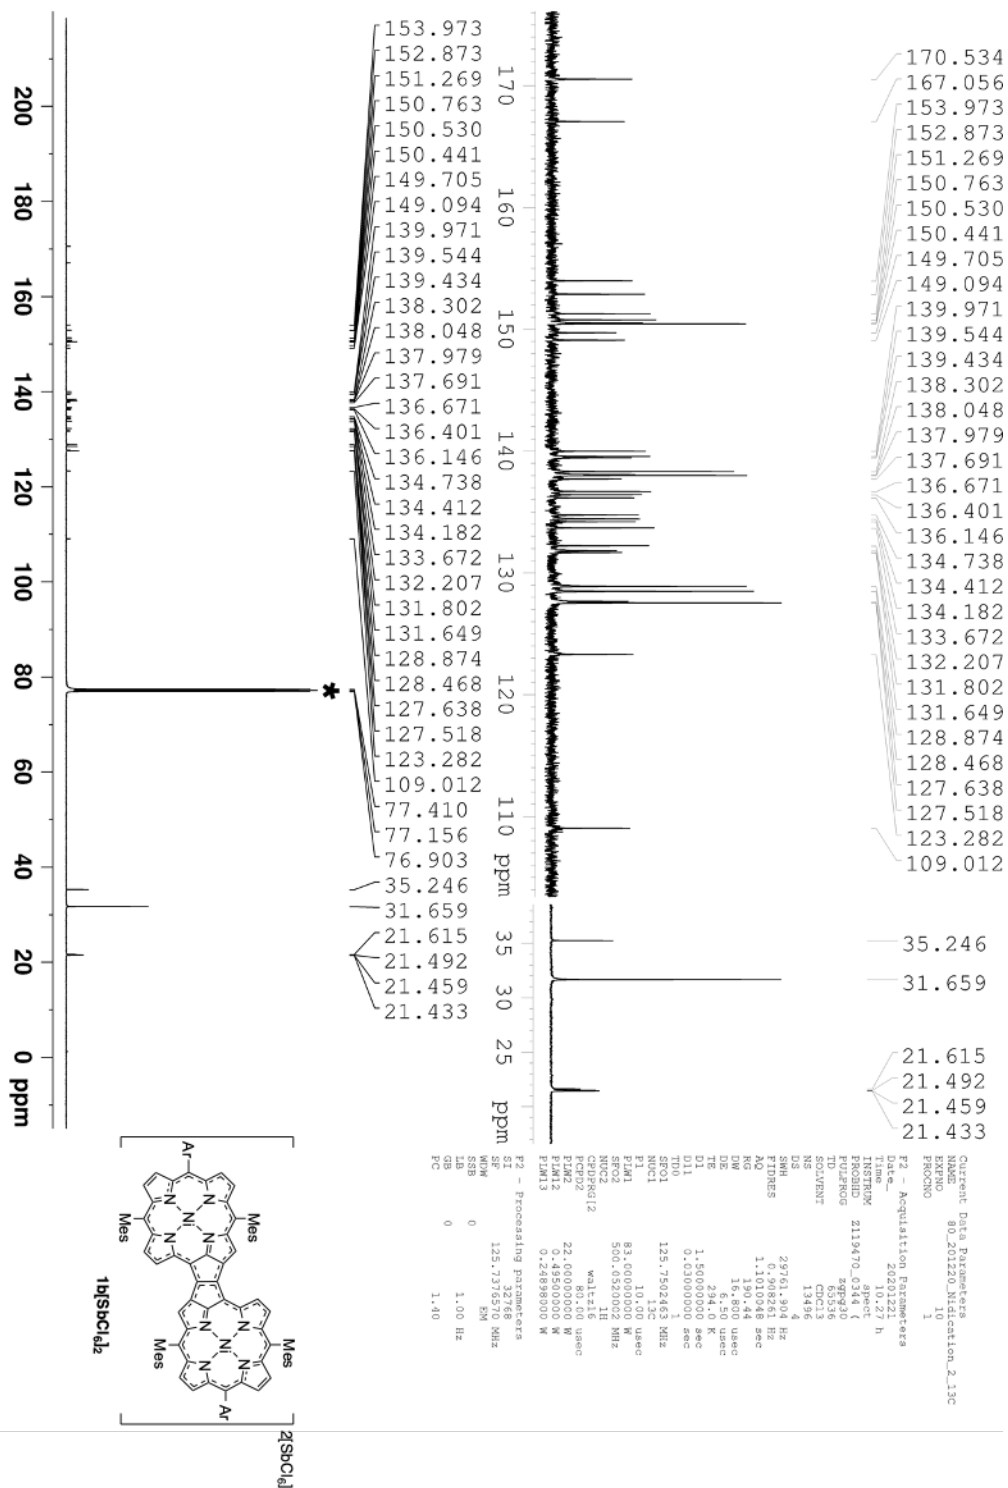

Fig. S16  $^{13}\text{C}$  NMR spectrum of **1b**[ $\text{SbCl}_6$ ] $_2$  in  $\text{CDCl}_3$  at 25  $^\circ\text{C}$ .

## 4. Crystal data

---

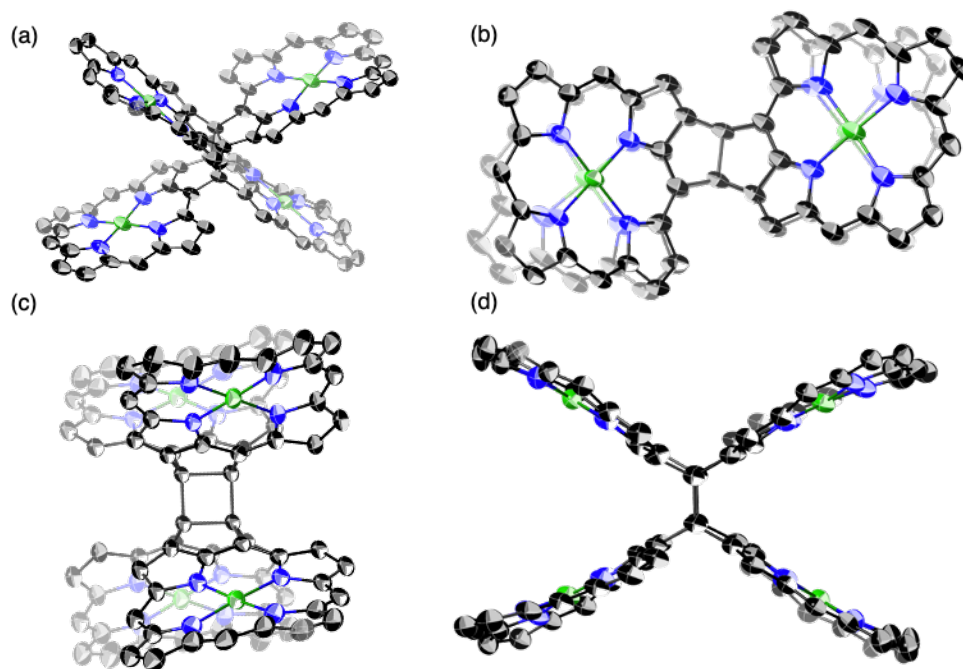

**Fig. S17** X-ray crystal structure of **4b**. (a) General view, (b) top view, and (c,d) side views. Thermal ellipsoids are shown at the 50% probability level. Solvent molecules, aryl groups, and all hydrogen atoms are omitted for clarity.

**Table S1** Crystallographic data of **4b** and **1b[SbCl<sub>6</sub>]<sub>2</sub>**.

| compound                                           | <b>4b</b>                                                         | <b>1b[SbCl<sub>6</sub>]<sub>2</sub></b>                                                           |
|----------------------------------------------------|-------------------------------------------------------------------|---------------------------------------------------------------------------------------------------|
| Formula                                            | C <sub>212</sub> H <sub>200</sub> N <sub>16</sub> Ni <sub>4</sub> | C <sub>106</sub> H <sub>100</sub> N <sub>8</sub> Ni <sub>2</sub> Cl <sub>12</sub> Sb <sub>2</sub> |
| Formula weight                                     | 3206.82                                                           | 2272.33                                                                                           |
| Crystal system                                     | triclinic                                                         | triclinic                                                                                         |
| Space group                                        | <i>P</i> -1 (No. 2)                                               | <i>P</i> -1 (No. 2)                                                                               |
| Crystal color                                      | orange                                                            | dark green                                                                                        |
| Crystal description                                | plate                                                             | needle                                                                                            |
| <i>a</i> [Å]                                       | 21.0654(6)                                                        | 9.2156(2)                                                                                         |
| <i>b</i> [Å]                                       | 22.4572(6)                                                        | 20.0257(6)                                                                                        |
| <i>c</i> [Å]                                       | 25.0542(7)                                                        | 21.5606(6)                                                                                        |
| $\alpha$ [°]                                       | 104.279(2)                                                        | 114.680(3)                                                                                        |
| $\beta$ [°]                                        | 98.423(2)                                                         | 94.469(2)                                                                                         |
| $\gamma$ [°]                                       | 111.649(2)                                                        | 98.787(2)                                                                                         |
| <i>V</i> [Å <sup>3</sup> ]                         | 10298.3(5)                                                        | 3528.31(18)                                                                                       |
| <i>Z</i>                                           | 2                                                                 | 2                                                                                                 |
| <i>d</i> <sub>calcd</sub> [g cm <sup>-3</sup> ]    | 1.212                                                             | 1.310                                                                                             |
| <i>R</i> <sub>1</sub> ( <i>I</i> > 2σ( <i>I</i> )) | 0.0926                                                            | 0.1965                                                                                            |
| <i>wR</i> <sub>2</sub> (all data)                  | 0.2855                                                            | 0.5915                                                                                            |
| Goodness-of-fit                                    | 1.061                                                             | 1.104                                                                                             |
| Temperature [K]                                    | 93                                                                | 93                                                                                                |
| Solvent                                            | toluene/MeCN                                                      | tetrachloroethane/hexane                                                                          |
| CCDC No.                                           | 2055689                                                           | 2055688                                                                                           |

## 5. Temperature-dependent $^1\text{H}$ NMR spectra

---

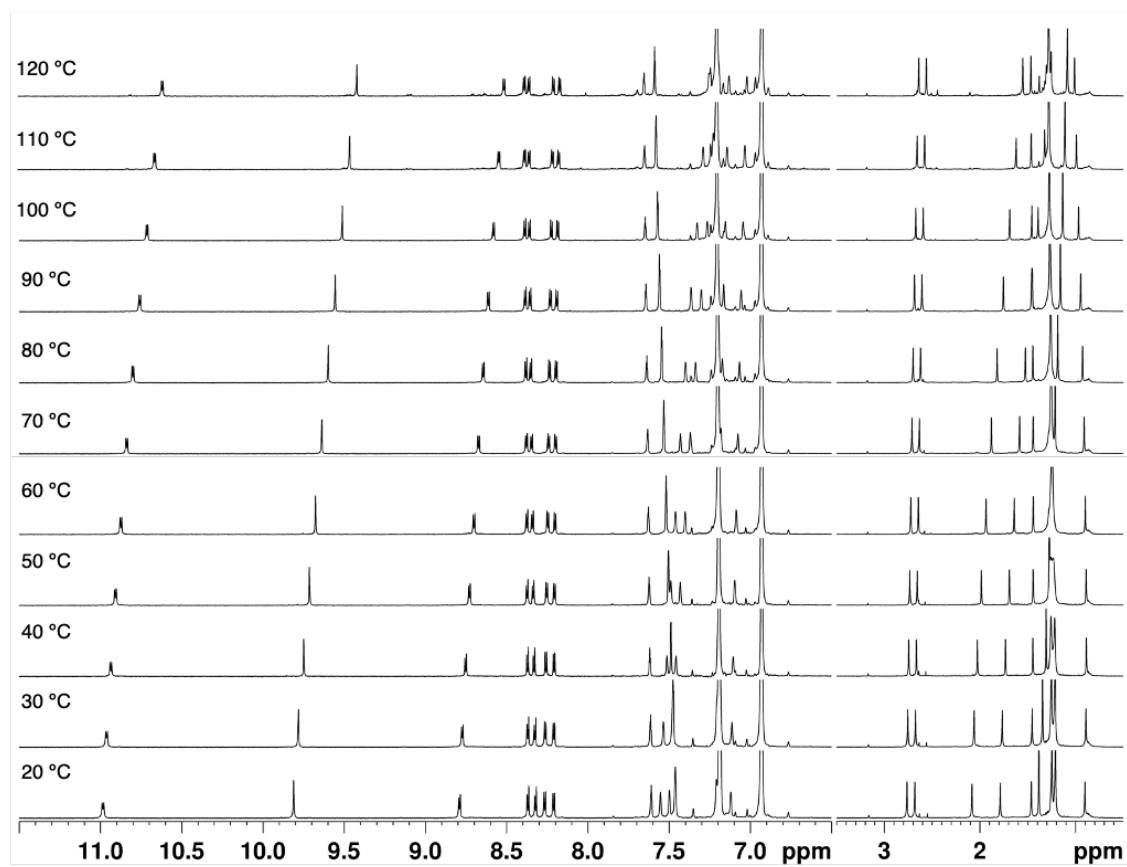

**Fig. S18** Temperature dependent  $^1\text{H}$  NMR spectra of **4b** in  $1,2\text{-dichlorobenzene-}d_4$ .

## 6. Temperature-dependent UV-vis absorption spectra

---

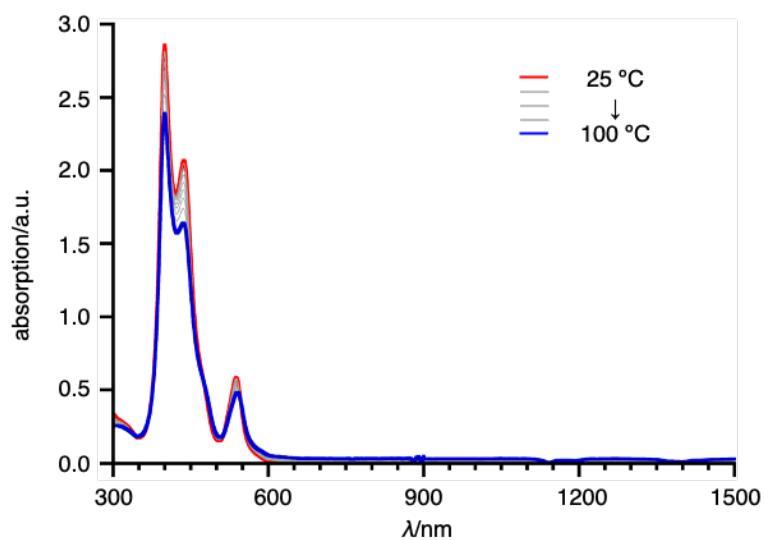

**Fig. S19** Temperature dependent UV-vis absorption spectra of **4b** in toluene.  $\lambda$  = wavelength.  $[\mathbf{4b}] = 6.7 \times 10^{-6} \text{ M}^{-1}$ .



## 7. Cyclic voltammograms

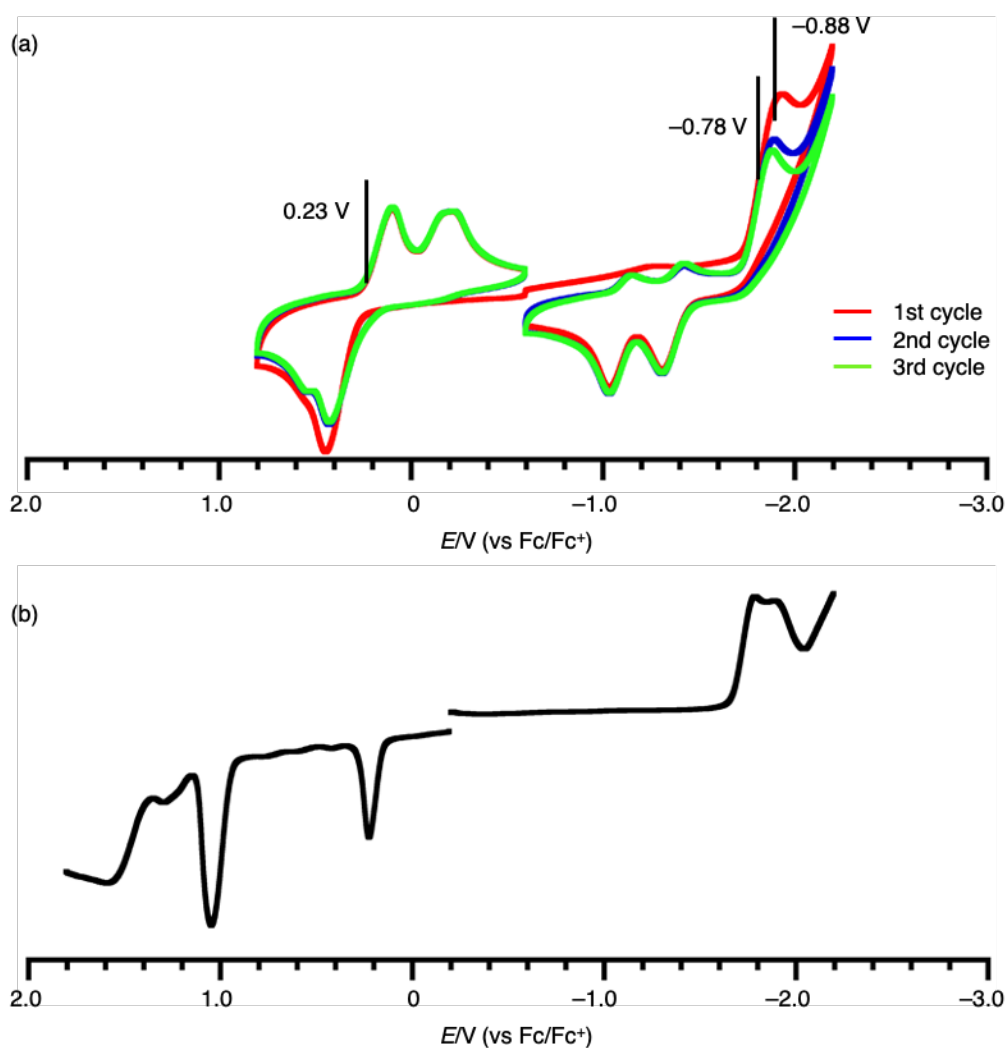

**Fig. S20** (a) Cyclic voltammograms and (b) differential pulse voltammograms of **4b**. Solvent:  $CH_2Cl_2$ , electrolyte: 0.1 M  $Bu_4NPF_6$ , working electrode: glassy carbon, counter electrode: Pt, reference electrode:  $Ag/AgNO_3$ , scan rate: 0.1 V/s.

## 8. Spectroelectrochemistry

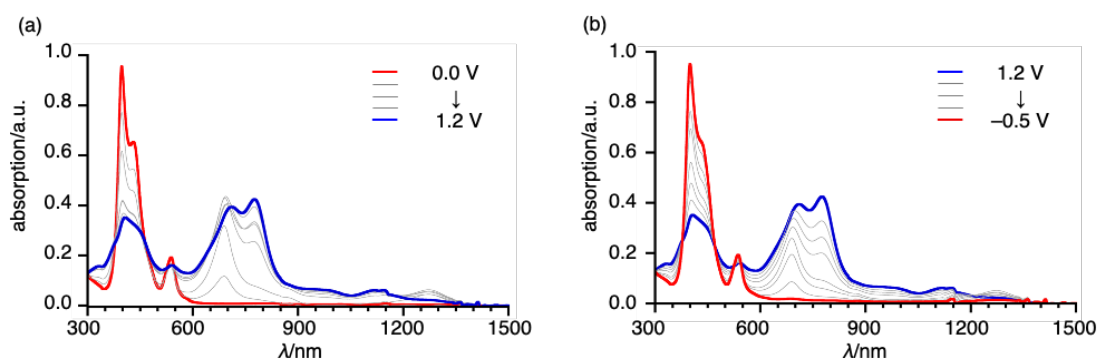

**Fig. S21** Electronic absorption spectra of **4b** upon application of a voltage in CH<sub>2</sub>Cl<sub>2</sub> using [Bu<sub>4</sub>N][PF<sub>6</sub>] as the supporting electrolyte. (a) from 0 V to 1.2 V and (b) from 1.2 V to -0.5 V (vs. Ag/Ag<sup>+</sup>).

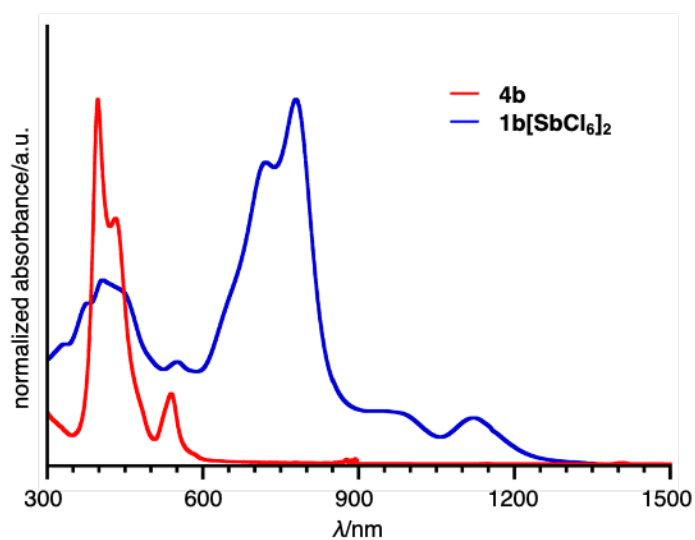

**Fig. S22** UV/vis absorption spectrum of **1b[SbCl<sub>6</sub>]<sub>2</sub>** and **4b** in CH<sub>2</sub>Cl<sub>2</sub>. λ = wavelength.

## 9. UV/vis/NIR absorption spectra

---

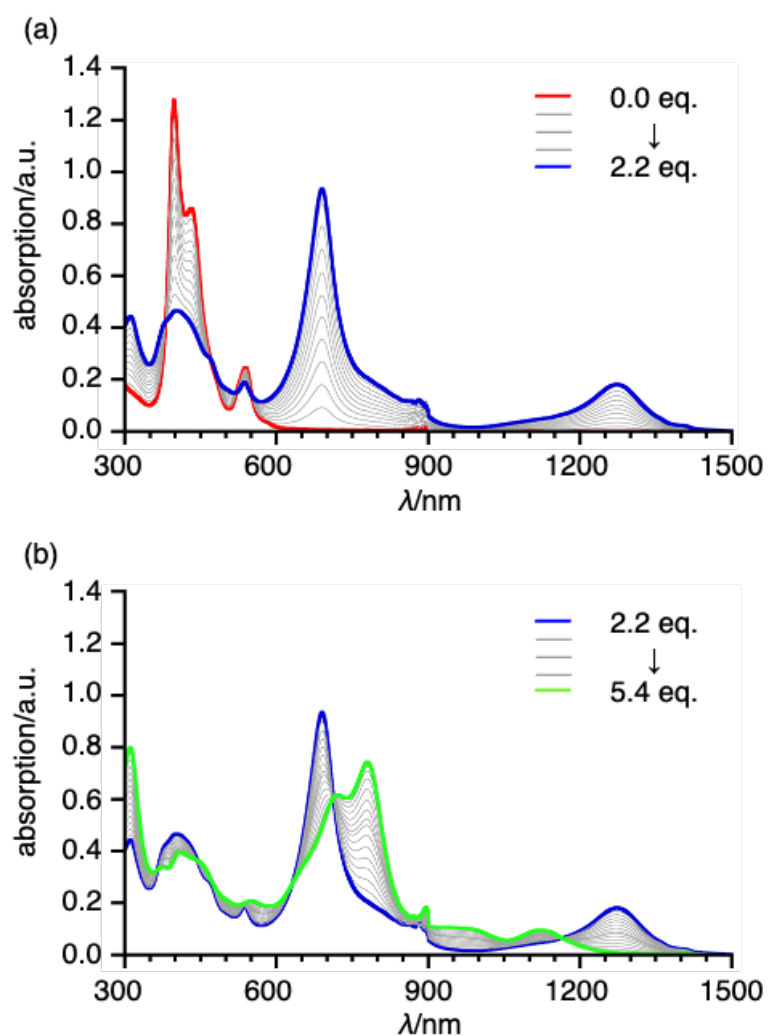

**Fig. S23** 2D plots for oxidative titration of **4b** with Magic Blue in  $\text{CH}_2\text{Cl}_2$ . (a) 0–2.2 equiv and (b) 2.2–5.4 equiv.  $\lambda$  = wavelength.  $[\mathbf{4b}]_0 = 3.0 \times 10^{-6} \text{ M}^{-1}$ .

## 10. Photostability

---

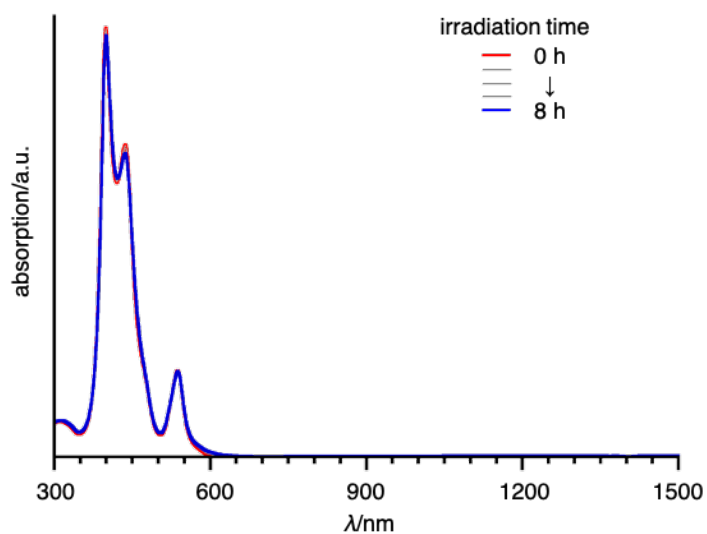

**Fig. S24** Changes in the UV/vis absorption spectra of **4b** upon photoirradiation in toluene. For the photoirradiation, a high-pressure mercury lamp equipped with a sharp cut filter ( $\lambda > 380$  nm) was employed.  $\lambda$  = wavelength.



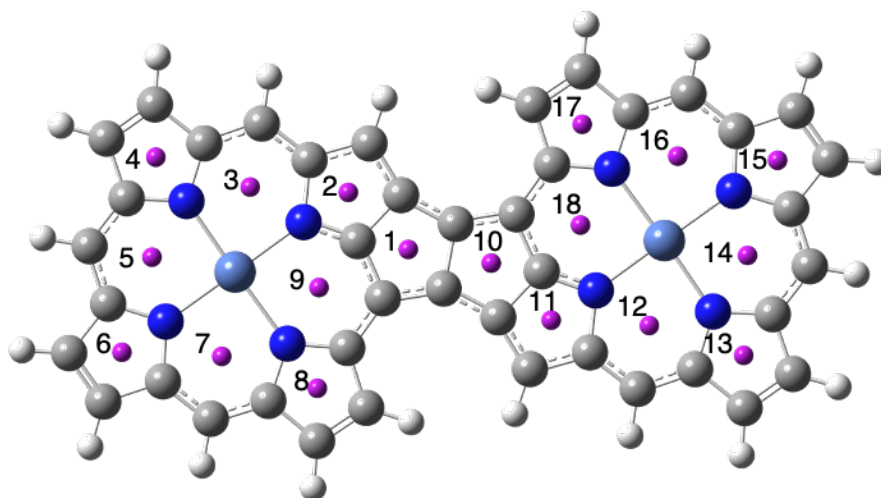

| position | NICS(0)  | position | NICS(0)  |
|----------|----------|----------|----------|
| 1        | -5.4103  | 10       | -5.4103  |
| 2        | -8.7366  | 11       | -8.7366  |
| 3        | -8.4672  | 12       | -8.4672  |
| 4        | -1.3995  | 13       | -1.3995  |
| 5        | -9.9619  | 14       | -9.9619  |
| 6        | -1.4216  | 15       | -1.4216  |
| 7        | -10.0324 | 16       | -10.0324 |
| 8        | -1.8230  | 17       | -1.8230  |
| 9        | -9.7640  | 18       | -9.7640  |

**Fig. S27** NICS values of **1b<sup>2+</sup>**.

**Table S2** Cartesian coordinate of **1b<sup>+</sup>**.

|   |           |           |           |    |           |           |           |
|---|-----------|-----------|-----------|----|-----------|-----------|-----------|
| C | -0.491975 | 2.099127  | -0.000155 | C  | -3.306153 | -2.1637   | -0.000154 |
| C | -1.466912 | 1.031778  | -0.000158 | H  | -3.700677 | -1.157641 | -0.000207 |
| C | -2.690692 | 1.664285  | 0.000002  | C  | -1.906464 | -2.500833 | -0.000123 |
| H | -3.690823 | 1.251076  | 0.000056  | C  | -0.833906 | -1.615063 | -0.000165 |
| C | -2.409063 | 3.078595  | 0.000063  | C  | -0.700842 | -0.184049 | -0.000169 |
| C | -3.334408 | 4.097917  | 0.000209  | C  | 0.700842  | 0.184049  | -0.000169 |
| C | -2.984262 | 5.445628  | 0.000235  | N  | -1.026511 | 3.31603   | -0.000037 |
| C | -3.949132 | 6.511416  | 0.000316  | N  | -1.697692 | 5.947079  | 0.000121  |
| H | -5.021857 | 6.369072  | 0.000396  | N  | 1.026511  | 6.613496  | -0.000015 |
| C | -3.24518  | 7.675928  | 0.000299  | N  | 1.719952  | 3.869882  | -0.000086 |
| H | -3.616376 | 8.692301  | 0.000355  | N  | 1.026511  | -3.31603  | -0.000037 |
| C | -1.853077 | 7.312918  | 0.000143  | N  | 1.697692  | -5.947079 | 0.000121  |
| C | -0.81429  | 8.233983  | 0.000062  | N  | -1.026511 | -6.613496 | -0.000015 |
| C | 0.525015  | 7.899702  | -0.000012 | N  | -1.719952 | -3.869882 | -0.000086 |
| C | 1.59406   | 8.86741   | -0.000049 | Ni | 0.001858  | 4.948732  | -0.000001 |
| H | 1.451374  | 9.940045  | -0.000049 | Ni | -0.001858 | -4.948732 | -0.000001 |
| C | 2.754696  | 8.162757  | -0.00009  | H  | -4.389892 | 3.846642  | 0.000294  |
| H | 3.772077  | 8.531239  | -0.00013  | H  | -4.36921  | -6.001734 | -0.000091 |
| C | 2.389569  | 6.766949  | -0.000057 | H  | 1.073642  | -9.287607 | 0.000078  |
| C | 3.318     | 5.733253  | -0.000075 | H  | 4.389892  | -3.846642 | 0.000294  |
| C | 2.996237  | 4.391707  | -0.000087 | H  | 4.36921   | 6.001734  | -0.000091 |
| C | 3.98526   | 3.338717  | -0.000106 | H  | -1.073642 | 9.287607  | 0.000078  |
| H | 5.055068  | 3.502155  | -0.000106 |    |           |           |           |
| C | 3.306153  | 2.1637    | -0.000154 |    |           |           |           |
| H | 3.700677  | 1.157641  | -0.000207 |    |           |           |           |
| C | 1.906464  | 2.500833  | -0.000123 |    |           |           |           |
| C | 0.833906  | 1.615063  | -0.000165 |    |           |           |           |
| C | 0.491975  | -2.099127 | -0.000155 |    |           |           |           |
| C | 1.466912  | -1.031778 | -0.000158 |    |           |           |           |
| C | 2.690692  | -1.664285 | 0.000002  |    |           |           |           |
| H | 3.690823  | -1.251076 | 0.000056  |    |           |           |           |
| C | 2.409063  | -3.078595 | 0.000063  |    |           |           |           |
| C | 3.334408  | -4.097917 | 0.000209  |    |           |           |           |
| C | 2.984262  | -5.445628 | 0.000235  |    |           |           |           |
| C | 3.949132  | -6.511416 | 0.000316  |    |           |           |           |
| H | 5.021857  | -6.369072 | 0.000396  |    |           |           |           |
| C | 3.24518   | -7.675928 | 0.000299  |    |           |           |           |
| H | 3.616376  | -8.692301 | 0.000355  |    |           |           |           |
| C | 1.853077  | -7.312918 | 0.000143  |    |           |           |           |
| C | 0.81429   | -8.233983 | 0.000062  |    |           |           |           |
| C | -0.525015 | -7.899702 | -0.000012 |    |           |           |           |
| C | -1.59406  | -8.86741  | -0.000049 |    |           |           |           |
| H | -1.451374 | -9.940045 | -0.000049 |    |           |           |           |
| C | -2.754696 | -8.162757 | -0.00009  |    |           |           |           |
| H | -3.772077 | -8.531239 | -0.00013  |    |           |           |           |
| C | -2.389569 | -6.766949 | -0.000057 |    |           |           |           |
| C | -3.318    | -5.733253 | -0.000075 |    |           |           |           |
| C | -2.996237 | -4.391707 | -0.000087 |    |           |           |           |
| C | -3.98526  | -3.338717 | -0.000106 |    |           |           |           |
| H | -5.055068 | -3.502155 | -0.000106 |    |           |           |           |

**Table S3** Cartesian coordinate of **1b<sup>2+</sup>**.

|   |           |           |           |    |           |           |           |
|---|-----------|-----------|-----------|----|-----------|-----------|-----------|
| C | 0.501032  | -2.078905 | -0.000066 | C  | 3.318069  | 2.165433  | -0.000073 |
| C | 1.477904  | -1.006539 | -0.000073 | H  | 3.722401  | 1.163781  | -0.000104 |
| C | 2.711087  | -1.641838 | 0.000007  | C  | 1.918196  | 2.49678   | -0.000059 |
| H | 3.708565  | -1.223942 | 0.000028  | C  | 0.845149  | 1.598571  | -0.000079 |
| C | 2.43262   | -3.039637 | 0.000038  | C  | 0.727154  | 0.194204  | -0.000086 |
| C | 3.348162  | -4.069017 | 0.000107  | C  | -0.727154 | -0.194204 | -0.000086 |
| C | 2.9933    | -5.41532  | 0.000115  | N  | 1.029283  | -3.280641 | -0.000005 |
| C | 3.966938  | -6.477901 | 0.000149  | N  | 1.708633  | -5.920139 | 0.000057  |
| H | 5.038845  | -6.330709 | 0.000191  | N  | -1.007839 | -6.600948 | -0.000009 |
| C | 3.269009  | -7.643249 | 0.000126  | N  | -1.718328 | -3.857535 | -0.000034 |
| H | 3.644056  | -8.658155 | 0.000142  | N  | -1.029283 | 3.280641  | -0.000005 |
| C | 1.872351  | -7.283489 | 0.000054  | N  | -1.708633 | 5.920139  | 0.000057  |
| C | 0.840581  | -8.211411 | 0.000006  | N  | 1.007839  | 6.600948  | -0.000009 |
| C | -0.502849 | -7.883766 | -0.000023 | N  | 1.718328  | 3.857535  | -0.000034 |
| C | -1.565419 | -8.859755 | -0.000046 | Ni | 0.005796  | -4.931267 | 0.000005  |
| H | -1.417657 | -9.931573 | -0.000058 | Ni | -0.005796 | 4.931267  | 0.000005  |
| C | -2.729635 | -8.160873 | -0.000051 | H  | 4.405255  | -3.824517 | 0.00015   |
| H | -3.744804 | -8.535147 | -0.000068 | H  | 4.352594  | 6.0093    | -0.000024 |
| C | -2.36863  | -6.763724 | -0.000024 | H  | -1.106225 | 9.263388  | 0.000002  |
| C | -3.303256 | -5.733122 | -0.000022 | H  | -4.405255 | 3.824517  | 0.00015   |
| C | -2.9933   | -4.389742 | -0.000028 | H  | -4.352594 | -6.0093   | -0.000024 |
| C | -3.990254 | -3.345008 | -0.000042 | H  | 1.106225  | -9.263388 | 0.000002  |
| H | -5.059003 | -3.514323 | -0.000039 |    |           |           |           |
| C | -3.318069 | -2.165433 | -0.000073 |    |           |           |           |
| H | -3.722401 | -1.163781 | -0.000104 |    |           |           |           |
| C | -1.918196 | -2.49678  | -0.000059 |    |           |           |           |
| C | -0.845149 | -1.598571 | -0.000079 |    |           |           |           |
| C | -0.501032 | 2.078905  | -0.000066 |    |           |           |           |
| C | -1.477904 | 1.006539  | -0.000073 |    |           |           |           |
| C | -2.711087 | 1.641838  | 0.000007  |    |           |           |           |
| H | -3.708565 | 1.223942  | 0.000028  |    |           |           |           |
| C | -2.43262  | 3.039637  | 0.000038  |    |           |           |           |
| C | -3.348162 | 4.069017  | 0.000107  |    |           |           |           |
| C | -2.9933   | 5.41532   | 0.000115  |    |           |           |           |
| C | -3.966938 | 6.477901  | 0.000149  |    |           |           |           |
| H | -5.038845 | 6.330709  | 0.000191  |    |           |           |           |
| C | -3.269009 | 7.643249  | 0.000126  |    |           |           |           |
| H | -3.644056 | 8.658155  | 0.000142  |    |           |           |           |
| C | -1.872351 | 7.283489  | 0.000054  |    |           |           |           |
| C | -0.840581 | 8.211411  | 0.000006  |    |           |           |           |
| C | 0.502849  | 7.883766  | -0.000023 |    |           |           |           |
| C | 1.565419  | 8.859755  | -0.000046 |    |           |           |           |
| H | 1.417657  | 9.931573  | -0.000058 |    |           |           |           |
| C | 2.729635  | 8.160873  | -0.000051 |    |           |           |           |
| H | 3.744804  | 8.535147  | -0.000068 |    |           |           |           |
| C | 2.36863   | 6.763724  | -0.000024 |    |           |           |           |
| C | 3.303256  | 5.733122  | -0.000022 |    |           |           |           |
| C | 2.9933    | 4.389742  | -0.000028 |    |           |           |           |
| C | 3.990254  | 3.345008  | -0.000042 |    |           |           |           |
| H | 5.059003  | 3.514323  | -0.000039 |    |           |           |           |



## 12. References

---

1. Gaussian 09, Revision E.01, M. J. Frisch, G. W. Trucks, H. B. Schlegel, G. E. Scuseria, M. A. Robb, J. R. Cheeseman, G. Scalmani, V. Barone, B. Mennucci, G. A. Petersson, H. Nakatsuji, M. Caricato, X. Li, H. P. Hratchian, A. F. Izmaylov, J. Bloino, G. Zheng, J. L. Sonnenberg, M. Hada, M. Ehara, K. Toyota, R. Fukuda, J. Hasegawa, M. Ishida, T. Nakajima, Y. Honda, O. Kitao, H. Nakai, T. Vreven, J. A. Montgomery, Jr., J. E. Peralta, F. Ogliaro, M. Bearpark, J. J. Heyd, E. Brothers, K. N. Kudin, V. N. Staroverov, T. Keith, R. Kobayashi, J. Normand, K. Raghavachari, A. Rendell, J. C. Burant, S. S. Iyengar, J. Tomasi, M. Cossi, N. Rega, J. M. Millam, M. Klene, J. E. Knox, J. B. Cross, V. Bakken, C. Adamo, J. Jaramillo, R. Gomperts, R. E. Stratmann, O. Yazyev, A. J. Austin, R. Cammi, C. Pomelli, J. W. Ochterski, R. L. Martin, K. Morokuma, V. G. Zakrzewski, G. A. Voth, P. Salvador, J. J. Dannenberg, S. Dapprich, A. D. Daniels, O. Farkas, J. B. Foresman, J. V. Ortiz, J. Cioslowski and D. J. Fox, Gaussian, Inc., Wallingford CT, 2013.
2. (a) K. Fujimoto, H. Yorimitsu and A. Osuka, *Org. Lett.*, 2014, **16**, 972–975. (b) K. Fujimoto and A. Osuka, *Chem. Sci.*, 2017, **8**, 8231–8239.
